# Supplementary material
Source: PubMed Central journal article supplement (PMC5915196)
Supplement: EHP1015.s001.acco.pdf [file EHP1015.s001.acco.pdf]

**Note to readers with disabilities:** *EHP* strives to ensure that all journal content is accessible to all readers. However, some figures and Supplemental Material published in *EHP* articles may not conform to [508 standards](#) due to the complexity of the information being presented. If you need assistance accessing journal content, please contact [ehponline@niehs.nih.gov](mailto:ehponline@niehs.nih.gov). Our staff will work with you to assess and meet your accessibility needs within 3 working days.

## **Supplemental Material**

### ***In Utero* Exposure to Select Phenols and Phthalates and Respiratory Health in Five Year-Old Boys: A Prospective Study**

Céline Vernet, Isabelle Pin, Lise Giorgis-Allemand, Claire Philippat, Meriem Benmerad, Joane Quentin, Antonia M. Calafat, Xiaoyun Ye, Isabella Annesi-Maesano, Valérie Siroux, Rémy Slama, and the EDEN mother-child cohort study group

#### **Table of Contents**

**Table S1.** Phthalates and associated urinary metabolites in the EDEN cohort.

**Table S2.** Spearman correlation between ln-transformed standardized phenol concentrations

**Table S3.** Spearman correlation between ln-transformed standardized phthalate metabolites concentrations.

**Table S4.** Adjusted associations between pregnancy phenols raw (non-standardized) concentrations and respiratory outcomes (n=587) and FEV<sub>1</sub>% (n=228) in boys. Models additionally adjusted for creatinine.

**Table S5.** Adjusted associations between pregnancy phthalate metabolites raw (non-standardized) concentrations and respiratory outcomes (n=587) and FEV<sub>1</sub>% (n=228) in boys. Models additionally adjusted for creatinine.

**Table S6.** Adjusted associations between pregnancy phenols standardized concentrations and respiratory outcomes (n=447) and FEV<sub>1</sub>% (n=171) in boys from non-smoking mothers.

**Table S7.** Adjusted associations between pregnancy phthalate metabolites standardized concentrations and respiratory outcomes (n=447) and FEV<sub>1</sub>% (n=171) in boys from non-smoking mothers.

**Table S8.** Adjusted associations between pregnancy phenols standardized concentrations and respiratory outcomes (n=470) and FEV<sub>1</sub>% (n=185) in boys from non-asthmatic parents.

**Table S9.** Adjusted associations between pregnancy phthalate metabolites standardized concentrations and respiratory outcomes (n=470) and FEV<sub>1</sub>% (n=185) in boys from non-asthmatic parents.

**Table S10.** Adjusted associations between pregnancy phenols standardized concentrations and respiratory outcomes (n=562) and FEV<sub>1</sub>% (n=217) in full-term boys.

**Table S11.** Adjusted associations between pregnancy phthalate metabolites standardized concentrations and respiratory outcomes (n=562) and FEV<sub>1</sub>% (n=217) in full-term boys.

**Figure S1.** Occurrence of doctor-diagnosed asthma (A), wheezing (B) and bronchiolitis/bronchitis (C), Kaplan-Meier estimates.

**Table S1.** Phthalates and associated urinary metabolites in the EDEN cohort

| Parent compound                        | Abbreviation | Urinary metabolites                      | Abbreviation |
|----------------------------------------|--------------|------------------------------------------|--------------|
| Diethyl phthalate                      | DEP          | Mono-ethyl phthalate                     | MEP          |
| Di-n-butyl phthalate                   | DnBP         | Mono-n-butyl phthalate                   | MnBP         |
| Di-isobutyl phthalate                  | DiBP         | Mono-isobutyl phthalate                  | MiBP         |
| Di- <i>n</i> -octylphthalate           | DNOP         | Mono-(3-carboxypropyl) phthalate         | MCP          |
| Di- <i>n</i> -butyl phthalate          | DnBP         |                                          |              |
| Other high molecular weight phthalates | /            |                                          |              |
| Butylbenzyl phthalate                  | BBzP         | Mono-benzyl phthalate                    | MBzP         |
| Di-isodecyl phthalate                  | DIDP         | Mono-(carboxynonyl) phthalate            | MCNP         |
| Di-isononyl phthalate                  | DINP         | Mono(carboxyoctyl) phthalate             | MCOP         |
| Di-2-ethylhexyl phthalate              | DEHP         | Mono-(2-ethyl-5-hydroxyhexyl) phthalate  | MEHHP        |
|                                        |              | Mono-(2-ethyl-5-oxohexyl) phthalate      | MEOHP        |
|                                        |              | Mono-(2-ethyl-5-carboxypentyl) phthalate | MECPP        |
|                                        |              | Mono-2-ethylhexyl phthalate              | MEHP         |

**Table S2.** Spearman correlation between ln-transformed standardized <sup>a</sup> phenol concentrations

|                | 2,4-DCP | 2,5-DCP | $\Sigma$ 2-DCP | BPA   | BP3  | TCS  | MP   | EP   | PP   | BP   | $\Sigma$ PB |
|----------------|---------|---------|----------------|-------|------|------|------|------|------|------|-------------|
| 2,4-DCP        | 1.00    |         |                |       |      |      |      |      |      |      |             |
| 2,5-DCP        | 0.82    | 1.00    |                |       |      |      |      |      |      |      |             |
| $\Sigma$ 2-DCP | 0.86    | 1.00    | 1.00           |       |      |      |      |      |      |      |             |
| BPA            | 0.01    | 0.05    | 0.05           | 1.00  |      |      |      |      |      |      |             |
| BP3            | 0.06    | 0.04    | 0.04           | 0.03  | 1.00 |      |      |      |      |      |             |
| TCS            | 0.13    | -0.11   | -0.08          | -0.05 | 0.01 | 1.00 |      |      |      |      |             |
| MP             | -0.02   | -0.09   | -0.08          | 0.07  | 0.20 | 0.15 | 1.00 |      |      |      |             |
| EP             | 0.08    | -0.04   | -0.02          | -0.03 | 0.15 | 0.16 | 0.55 | 1.00 |      |      |             |
| PP             | 0.00    | -0.07   | -0.06          | 0.00  | 0.12 | 0.22 | 0.81 | 0.49 | 1.00 |      |             |
| BP             | 0.03    | -0.11   | -0.09          | 0.00  | 0.16 | 0.23 | 0.55 | 0.68 | 0.53 | 1.00 |             |
| $\Sigma$ PB    | -0.01   | -0.09   | -0.08          | 0.05  | 0.19 | 0.17 | 0.99 | 0.59 | 0.84 | 0.58 | 1.00        |

2,4-DCP = 2,4-Dichlorophenol; 2,5-DCP = 2,5-Dichlorophenol;  $\Sigma$ 2-DCP = molar sum of 2-Dichlorophenols (2,4-DCP, 2,5-DCP); BPA = Bisphenol A; BP3 = Benzophenone-3; TCS = Triclosan; MP = Methyl-paraben; EP = Ethyl-paraben; PP = Propyl-paraben; BP = Butyl-paraben;  $\Sigma$ PB = molar sum of parabens (MP, EP, PP, BP).

<sup>a</sup> Standardized for urine sampling conditions (creatinine level, day and hour of sampling, gestational age, storage duration at room temperature and year of analysis), as detailed in *Mortamais et al.* (2012).

**Table S3.** Spearman correlation between ln-transformed standardized<sup>a</sup> phthalate metabolites concentrations

|       | ΣLMW | MEP   | MnBP | MiBP | ΣHMW | MCPP | MBzP | MCNP | MCOP | MEHHP | MEOHP | MECPP | MEHP | ΣDEHP |
|-------|------|-------|------|------|------|------|------|------|------|-------|-------|-------|------|-------|
| ΣLMW  | 1.00 |       |      |      |      |      |      |      |      |       |       |       |      |       |
| MEP   | 0.78 | 1.00  |      |      |      |      |      |      |      |       |       |       |      |       |
| MnBP  | 0.59 | 0.08  | 1.00 |      |      |      |      |      |      |       |       |       |      |       |
| MiBP  | 0.33 | 0.03  | 0.39 | 1.00 |      |      |      |      |      |       |       |       |      |       |
| ΣHMW  | 0.16 | 0.00  | 0.33 | 0.37 | 1.00 |      |      |      |      |       |       |       |      |       |
| MCPP  | 0.41 | 0.04  | 0.64 | 0.24 | 0.31 | 1.00 |      |      |      |       |       |       |      |       |
| MBzP  | 0.27 | 0.12  | 0.37 | 0.43 | 0.57 | 0.23 | 1.00 |      |      |       |       |       |      |       |
| MCNP  | 0.05 | 0.03  | 0.06 | 0.10 | 0.28 | 0.29 | 0.13 | 1.00 |      |       |       |       |      |       |
| MCOP  | 0.06 | 0.02  | 0.06 | 0.12 | 0.44 | 0.23 | 0.25 | 0.44 | 1.00 |       |       |       |      |       |
| MEHHP | 0.11 | 0.01  | 0.25 | 0.31 | 0.93 | 0.21 | 0.38 | 0.21 | 0.35 | 1.00  |       |       |      |       |
| MEOHP | 0.11 | 0.00  | 0.26 | 0.35 | 0.95 | 0.23 | 0.41 | 0.22 | 0.37 | 0.98  | 1.00  |       |      |       |
| MECPP | 0.03 | -0.04 | 0.18 | 0.26 | 0.93 | 0.18 | 0.32 | 0.23 | 0.37 | 0.94  | 0.95  | 1.00  |      |       |
| MEHP  | 0.10 | -0.01 | 0.22 | 0.36 | 0.83 | 0.19 | 0.38 | 0.16 | 0.33 | 0.82  | 0.84  | 0.80  | 1.00 |       |
| ΣDEHP | 0.08 | -0.02 | 0.23 | 0.31 | 0.95 | 0.20 | 0.37 | 0.22 | 0.36 | 0.98  | 0.99  | 0.98  | 0.86 | 1.00  |

ΣLMW = molar sum of Low Molecular Weight phthalates (MEP, MnBP, MiBP); MEP = Monoethyl phthalate; MnBP = Mono-n-butyl phthalate; MiBP = Mono-isobutyl phthalate; ΣHMW = molar sum of High Molecular Weight phthalates (MCPP, MBzP, MCNP, MCOP, MEHHP, MEOHP, MECPP, MEHP); MCPP = Mono (3-carboxypropyl) phthalate; MBzP = Monobenzyl phthalate; MCNP = Mono-(carboxynonyl) phthalate, MCOP = Monocarboxy-isooctyl phthalate; MEHHP = Mono(2-ethyl-5-hydroxyhexyl) phthalate; MEOHP = Mono(2-ethyl-5-oxohexyl) phthalate; MECPP = Mono(2-ethyl-5-carboxypentyl) phthalate; MEHP = Mono(2-ethylhexyl) phthalate; ΣDEHP = molar sum of di(2-ethylhexyl) phthalate metabolites (MEHHP, MEOHP, MECPP, MEHP).

<sup>a</sup> Standardized for urine sampling conditions (creatinine level, day and hour of sampling, gestational age, storage duration at room temperature and year of analysis), as detailed in *Mortamais et al. (2012)*.

**Table S4.** Adjusted associations between pregnancy phenols raw (non-standardized) concentrations and respiratory outcomes (n=587) and FEV<sub>1</sub>% (n=228) in boys. Models additionally adjusted for creatinine.

| Phenol <sup>c</sup>       | Wheezing<br>(until age 5y) <sup>a</sup> |                               |         | Asthma diagnosis<br>(until age 5y) <sup>a</sup> |                               |         | Bronchiolitis/Bronchitis<br>(until age 3y) <sup>a</sup> |                               |         | FEV <sub>1</sub> % <sup>b</sup> |                               |         |
|---------------------------|-----------------------------------------|-------------------------------|---------|-------------------------------------------------|-------------------------------|---------|---------------------------------------------------------|-------------------------------|---------|---------------------------------|-------------------------------|---------|
|                           | HR (95% CI)                             | p <sub>het</sub> <sup>e</sup> | p-value | HR (95% CI)                                     | p <sub>het</sub> <sup>e</sup> | p-value | HR (95% CI)                                             | p <sub>het</sub> <sup>e</sup> | p-value | beta (95% CI)                   | p <sub>het</sub> <sup>e</sup> | p-value |
|                           | N = 587                                 |                               |         | N = 587                                         |                               |         | N = 587                                                 |                               |         | N = 228                         |                               |         |
| <b>2,4-Dichlorophenol</b> |                                         |                               |         |                                                 |                               |         |                                                         |                               |         |                                 |                               |         |
| Continuous <sup>d</sup>   | 1.06 (0.95, 1.18)                       |                               | 0.27    | 1.02 (0.87, 1.20)                               |                               | 0.79    | 0.98 (0.89, 1.08)                                       |                               | 0.69    | 0.31 (-0.93, 1.55)              |                               | 0.62    |
| T1                        | 1.00                                    | 0.31                          | 0.23    | 1.00                                            | 0.85                          | 0.64    | 1.00                                                    | 0.93                          | 0.71    | 0.00                            | 0.91                          | 0.85    |
| T2                        | 0.89 (0.64, 1.22)                       |                               |         | 0.94 (0.58, 1.52)                               |                               |         | 1.00 (0.78, 1.29)                                       |                               |         | 0.54 (-3.11, 4.18)              |                               |         |
| T3                        | 1.13 (0.83, 1.55)                       |                               |         | 1.08 (0.67, 1.74)                               |                               |         | 0.96 (0.74, 1.24)                                       |                               |         | -0.20 (-3.93, 3.54)             |                               |         |
| <b>2,5-Dichlorophenol</b> |                                         |                               |         |                                                 |                               |         |                                                         |                               |         |                                 |                               |         |
| Continuous <sup>d</sup>   | 1.08 (1.00, 1.16)                       |                               | 0.04    | 1.04 (0.93, 1.16)                               |                               | 0.53    | 1.00 (0.94, 1.07)                                       |                               | 0.97    | 0.18 (-0.67, 1.03)              |                               | 0.68    |
| T1                        | 1.00                                    | 0.02                          | 0.39    | 1.00                                            | 0.22                          | 0.50    | 1.00                                                    | 0.84                          | 0.67    | 0.00                            | 0.82                          | 0.85    |
| T2                        | 1.57 (1.14, 2.16)                       |                               |         | 1.51 (0.94, 2.42)                               |                               |         | 1.06 (0.82, 1.37)                                       |                               |         | 1.15 (-2.50, 4.80)              |                               |         |
| T3                        | 1.38 (1.00, 1.91)                       |                               |         | 1.37 (0.85, 2.23)                               |                               |         | 1.07 (0.84, 1.38)                                       |                               |         | 0.87 (-2.82, 4.56)              |                               |         |
| <b>∑Dichlorophenols</b>   |                                         |                               |         |                                                 |                               |         |                                                         |                               |         |                                 |                               |         |
| Continuous <sup>d</sup>   | 1.08 (1.00, 1.17)                       |                               | 0.05    | 1.04 (0.92, 1.17)                               |                               | 0.56    | 1.00 (0.94, 1.07)                                       |                               | 1.00    | 0.21 (-0.69, 1.11)              |                               | 0.65    |
| T1                        | 1.00                                    | 0.02                          | 0.41    | 1.00                                            | 0.17                          | 0.53    | 1.00                                                    | 0.67                          | 0.51    | 0.00                            | 0.76                          | 0.85    |
| T2                        | 1.59 (1.15, 2.19)                       |                               |         | 1.57 (0.97, 2.53)                               |                               |         | 1.09 (0.85, 1.41)                                       |                               |         | 1.36 (-2.35, 5.06)              |                               |         |
| T3                        | 1.39 (1.00, 1.93)                       |                               |         | 1.39 (0.85, 2.27)                               |                               |         | 1.12 (0.87, 1.44)                                       |                               |         | 0.99 (-2.72, 4.70)              |                               |         |
| <b>Bisphenol A</b>        |                                         |                               |         |                                                 |                               |         |                                                         |                               |         |                                 |                               |         |
| Continuous <sup>d</sup>   | 0.98 (0.83, 1.15)                       |                               | 0.77    | 1.21 (0.96, 1.53)                               |                               | 0.11    | 1.13 (0.99, 1.30)                                       |                               | 0.07    | -0.55 (-2.34, 1.23)             |                               | 0.54    |
| T1                        | 1.00                                    | 0.14                          | 0.71    | 1.00                                            | 0.51                          | 0.43    | 1.00                                                    | 0.11                          | 0.13    | 0.00                            | 0.61                          | 0.46    |
| T2                        | 1.33 (0.97, 1.82)                       |                               |         | 1.30 (0.79, 2.14)                               |                               |         | 1.27 (0.98, 1.63)                                       |                               |         | -1.52 (-5.13, 2.09)             |                               |         |
| T3                        | 1.05 (0.74, 1.49)                       |                               |         | 1.32 (0.79, 2.19)                               |                               |         | 1.29 (0.99, 1.70)                                       |                               |         | -1.87 (-5.84, 2.10)             |                               |         |
| <b>Benzophenone-3</b>     |                                         |                               |         |                                                 |                               |         |                                                         |                               |         |                                 |                               |         |
| Continuous <sup>d</sup>   | 0.94 (0.87, 1.01)                       |                               | 0.10    | 0.96 (0.85, 1.07)                               |                               | 0.46    | 0.99 (0.93, 1.05)                                       |                               | 0.82    | -0.32 (-1.19, 0.54)             |                               | 0.46    |
| T1                        | 1.00                                    | 0.14                          | 0.05    | 1.00                                            | 0.15                          | 0.27    | 1.00                                                    | 0.73                          | 0.43    | 0.00                            | 0.80                          | 0.50    |
| T2                        | 0.96 (0.71, 1.30)                       |                               |         | 0.67 (0.43, 1.07)                               |                               |         | 0.98 (0.77, 1.25)                                       |                               |         | -0.09 (-3.61, 3.42)             |                               |         |
| T3                        | 0.74 (0.54, 1.02)                       |                               |         | 0.68 (0.42, 1.09)                               |                               |         | 0.91 (0.70, 1.17)                                       |                               |         | -1.09 (-4.68, 2.50)             |                               |         |
| <b>Triclosan</b>          |                                         |                               |         |                                                 |                               |         |                                                         |                               |         |                                 |                               |         |
| Continuous <sup>d</sup>   | 0.98 (0.94, 1.03)                       |                               | 0.50    | 0.99 (0.92, 1.07)                               |                               | 0.86    | 0.99 (0.96, 1.03)                                       |                               | 0.79    | 0.18 (-0.38, 0.75)              |                               | 0.52    |
| T1                        | 1.00                                    | 0.74                          | 0.85    | 1.00                                            | 0.83                          | 0.81    | 1.00                                                    | 0.95                          | 0.82    | 0.00                            | 0.97                          | 0.86    |
| T2                        | 0.89 (0.65, 1.21)                       |                               |         | 1.13 (0.72, 1.77)                               |                               |         | 0.97 (0.76, 1.24)                                       |                               |         | -0.25 (-3.72, 3.22)             |                               |         |
| T3                        | 0.93 (0.69, 1.25)                       |                               |         | 1.00 (0.63, 1.60)                               |                               |         | 0.96 (0.76, 1.23)                                       |                               |         | 0.19 (-3.31, 3.69)              |                               |         |
| <b>Methyl-paraben</b>     |                                         |                               |         |                                                 |                               |         |                                                         |                               |         |                                 |                               |         |
| Continuous <sup>d</sup>   | 0.93 (0.85, 1.00)                       |                               | 0.06    | 0.99 (0.88, 1.12)                               |                               | 0.91    | 0.94 (0.88, 1.00)                                       |                               | 0.05    | -0.38 (-1.22, 0.46)             |                               | 0.37    |
| T1                        | 1.00                                    | 0.11                          | 0.21    | 1.00                                            | 0.56                          | 0.70    | 1.00                                                    | 0.02                          | 0.01    | 0.00                            | 0.65                          | 0.44    |
| T2                        | 0.75 (0.55, 1.02)                       |                               |         | 1.23 (0.78, 1.95)                               |                               |         | 0.82 (0.65, 1.05)                                       |                               |         | 0.65 (-2.85, 4.14)              |                               |         |
| T3                        | 0.76 (0.56, 1.04)                       |                               |         | 0.99 (0.60, 1.62)                               |                               |         | 0.68 (0.53, 0.89)                                       |                               |         | -1.03 (-4.70, 2.63)             |                               |         |
| <b>Ethyl-paraben</b>      |                                         |                               |         |                                                 |                               |         |                                                         |                               |         |                                 |                               |         |
| Continuous <sup>d</sup>   | 1.01 (0.96, 1.08)                       |                               | 0.63    | 1.09 (1.00, 1.20)                               |                               | 0.06    | 0.99 (0.94, 1.03)                                       |                               | 0.56    | -0.55 (-1.19, 0.10)             |                               | 0.10    |
| T1                        | 1.00                                    | 0.82                          | 0.55    | 1.00                                            | 0.18                          | 0.31    | 1.00                                                    | 0.02                          | 0.05    | 0.00                            | 0.20                          | 0.08    |
| T2                        | 0.98 (0.71, 1.34)                       |                               |         | 1.51 (0.93, 2.44)                               |                               |         | 1.22 (0.96, 1.56)                                       |                               |         | 0.19 (-3.41, 3.80)              |                               |         |
| T3                        | 1.07 (0.78, 1.48)                       |                               |         | 1.51 (0.91, 2.51)                               |                               |         | 0.87 (0.67, 1.13)                                       |                               |         | -2.65 (-6.25, 0.96)             |                               |         |
| <b>Propyl-paraben</b>     |                                         |                               |         |                                                 |                               |         |                                                         |                               |         |                                 |                               |         |
| Continuous <sup>d</sup>   | 0.96 (0.90, 1.02)                       |                               | 0.18    | 0.98 (0.89, 1.08)                               |                               | 0.71    | 0.96 (0.91, 1.01)                                       |                               | 0.09    | -0.12 (-0.82, 0.59)             |                               | 0.74    |
| T1                        | 1.00                                    | 0.53                          | 0.31    | 1.00                                            | 0.43                          | 0.37    | 1.00                                                    | 0.03                          | 0.05    | 0.00                            | 0.68                          | 0.38    |
| T2                        | 0.91 (0.67, 1.23)                       |                               |         | 1.19 (0.75, 1.86)                               |                               |         | 0.77 (0.61, 0.99)                                       |                               |         | -0.37 (-3.94, 3.20)             |                               |         |
| T3                        | 0.84 (0.61, 1.14)                       |                               |         | 0.87 (0.53, 1.42)                               |                               |         | 0.73 (0.57, 0.94)                                       |                               |         | -1.56 (-5.18, 2.07)             |                               |         |
| <b>Butyl-paraben</b>      |                                         |                               |         |                                                 |                               |         |                                                         |                               |         |                                 |                               |         |
| Continuous <sup>d</sup>   | 0.98 (0.92, 1.04)                       |                               | 0.54    | 1.00 (0.91, 1.10)                               |                               | 0.98    | 0.97 (0.93, 1.02)                                       |                               | 0.29    | -0.37 (-1.05, 0.30)             |                               | 0.28    |
| T1                        | 1.00                                    | 0.43                          | 0.20    | 1.00                                            | 1.00                          | 0.96    | 1.00                                                    | 0.003                         | 0.002   | 0.00                            | 0.67                          | 0.58    |
| T2                        | 1.01 (0.75, 1.37)                       |                               |         | 1.02 (0.64, 1.61)                               |                               |         | 1.15 (0.90, 1.46)                                       |                               |         | -1.30 (-4.79, 2.19)             |                               |         |
| T3                        | 0.84 (0.61, 1.16)                       |                               |         | 1.00 (0.61, 1.63)                               |                               |         | 0.75 (0.58, 0.97)                                       |                               |         | -1.48 (-5.01, 2.04)             |                               |         |
| <b>∑Parabens</b>          |                                         |                               |         |                                                 |                               |         |                                                         |                               |         |                                 |                               |         |
| Continuous <sup>d</sup>   | 0.93 (0.86, 1.00)                       |                               | 0.06    | 0.99 (0.88, 1.12)                               |                               | 0.93    | 0.94 (0.88, 1.00)                                       |                               | 0.06    | -0.37 (-1.21, 0.47)             |                               | 0.39    |
| T1                        | 1.00                                    | 0.13                          | 0.07    | 1.00                                            | 0.34                          | 0.46    | 1.00                                                    | 0.02                          | 0.004   | 0.00                            | 0.81                          | 0.56    |
| T2                        | 0.83 (0.62, 1.13)                       |                               |         | 1.27 (0.81, 2.00)                               |                               |         | 0.90 (0.71, 1.14)                                       |                               |         | 0.28 (-3.19, 3.74)              |                               |         |
| T3                        | 0.72 (0.52, 0.99)                       |                               |         | 0.92 (0.55, 1.52)                               |                               |         | 0.69 (0.53, 0.89)                                       |                               |         | -0.88 (-4.57, 2.80)             |                               |         |

HR = hazard ratio; FEV<sub>1</sub>% = forced expiratory volume in 1 second expressed in percent predicted; CI = confidence interval; ∑Dichlorophenols = molar sum of 2-Dichlorophenols (2,4-, 2,5-dichlorophenols); ∑Parabens = molar sum of parabens (Methyl-, Ethyl-, Propyl-, Butyl-parabens).

<sup>a</sup> Models adjusted for creatinine, centre, residence area, parental history of asthma or allergies, maternal ethnicity, maximal parental education level, maternal or passive smoking during pregnancy, postnatal passive smoking, older siblings, day-care. Missing values in covariates were imputed for at least one covariate in 277 boys, using the MICE multiple imputation method (100 imputations were performed) <sup>b</sup> additionally adjusted for child's height and age.

<sup>c</sup> Crude concentrations.

<sup>d</sup> Estimates for 1 unit increase in ln-transformed standardized concentration.

<sup>e</sup> p-values of heterogeneity test.

Italicized p-values are p-values of monotonic trend test.

**Table S5.** Adjusted associations between pregnancy phthalate metabolites raw (non-standardized) concentrations and respiratory outcomes (n=587) and FEV<sub>1</sub>% (n=228) in boys. Models additionally adjusted for creatinine.

| Phthalate <sup>c</sup>  | Wheezing (until age 5y) <sup>a</sup> |                               |         | Asthma diagnosis (until age 5y) <sup>a</sup> |                               |         | Bronchiolitis/Bronchitis (until age 3y) <sup>a</sup> |                               |         | FEV <sub>1</sub> % <sup>b</sup> |                               |         |
|-------------------------|--------------------------------------|-------------------------------|---------|----------------------------------------------|-------------------------------|---------|------------------------------------------------------|-------------------------------|---------|---------------------------------|-------------------------------|---------|
|                         | HR (95% CI)                          | p <sub>het</sub> <sup>e</sup> | p-value | HR (95% CI)                                  | p <sub>het</sub> <sup>e</sup> | p-value | HR (95% CI)                                          | p <sub>het</sub> <sup>e</sup> | p-value | beta (95% CI)                   | p <sub>het</sub> <sup>e</sup> | p-value |
| <b>ΣLMW</b>             | N = 587                              |                               |         | N = 587                                      |                               |         | N = 587                                              |                               |         | N = 228                         |                               |         |
| Continuous <sup>d</sup> | 0.97 (0.84, 1.12)                    | 0.80                          | 0.69    | 0.97 (0.78, 1.21)                            | 0.94                          | 0.80    | 1.00 (0.89, 1.12)                                    | 0.71                          | 1.00    | -0.43 (-2.14, 1.27)             | 0.16                          | 0.62    |
| T1                      | 1.00                                 |                               | 0.86    | 1.00                                         |                               | 0.75    | 1.00                                                 |                               | 0.72    | 0.00                            |                               | 0.06    |
| T2                      | 1.10 (0.79, 1.52)                    |                               |         | 0.94 (0.58, 1.52)                            |                               |         | 0.92 (0.71, 1.19)                                    |                               |         | 0.35 (-3.23, 3.92)              |                               |         |
| T3                      | 1.01 (0.71, 1.43)                    |                               |         | 0.91 (0.54, 1.53)                            |                               |         | 1.01 (0.77, 1.34)                                    |                               |         | -3.00 (-6.96, 0.96)             |                               |         |
| <b>MEP</b>              |                                      |                               |         |                                              |                               |         |                                                      |                               |         |                                 |                               |         |
| Continuous <sup>d</sup> | 0.99 (0.88, 1.11)                    | 0.87                          | 0.86    | 1.03 (0.87, 1.22)                            | 0.99                          | 0.72    | 1.02 (0.94, 1.12)                                    | 0.75                          | 0.63    | -0.10 (-1.45, 1.24)             | 0.67                          | 0.88    |
| T1                      | 1.00                                 |                               | 0.80    | 1.00                                         |                               | 0.90    | 1.00                                                 |                               | 0.99    | 0.00                            |                               | 0.51    |
| T2                      | 1.07 (0.77, 1.47)                    |                               |         | 0.99 (0.61, 1.60)                            |                               |         | 1.10 (0.85, 1.42)                                    |                               |         | 0.87 (-2.65, 4.39)              |                               |         |
| T3                      | 0.99 (0.71, 1.38)                    |                               |         | 1.02 (0.62, 1.69)                            |                               |         | 1.04 (0.80, 1.36)                                    |                               |         | -0.77 (-4.72, 3.19)             |                               |         |
| <b>MnBP</b>             |                                      |                               |         |                                              |                               |         |                                                      |                               |         |                                 |                               |         |
| Continuous <sup>d</sup> | 1.03 (0.92, 1.16)                    | 0.64                          | 0.62    | 1.00 (0.83, 1.19)                            | 0.64                          | 0.96    | 0.98 (0.89, 1.07)                                    | 0.69                          | 0.61    | -0.35 (-1.69, 0.99)             | 0.41                          | 0.61    |
| T1                      | 1.00                                 |                               | 0.36    | 1.00                                         |                               | 0.89    | 1.00                                                 |                               | 0.98    | 0.00                            |                               | 0.34    |
| T2                      | 1.01 (0.73, 1.40)                    |                               |         | 1.23 (0.76, 1.96)                            |                               |         | 0.90 (0.69, 1.16)                                    |                               |         | 1.47 (-2.13, 5.09)              |                               |         |
| T3                      | 1.15 (0.81, 1.64)                    |                               |         | 1.04 (0.61, 1.79)                            |                               |         | 0.96 (0.73, 1.28)                                    |                               |         | -0.89 (-4.89, 3.11)             |                               |         |
| <b>MiBP</b>             |                                      |                               |         |                                              |                               |         |                                                      |                               |         |                                 |                               |         |
| Continuous <sup>d</sup> | 0.98 (0.84, 1.14)                    | 0.28                          | 0.76    | 1.03 (0.81, 1.30)                            | 0.36                          | 0.82    | 1.02 (0.90, 1.16)                                    | 0.92                          | 0.72    | -1.34 (-3.02, 0.34)             | 0.14                          | 0.12    |
| T1                      | 1.00                                 |                               | 0.22    | 1.00                                         |                               | 0.47    | 1.00                                                 |                               | 0.96    | 0.00                            |                               | 0.06    |
| T2                      | 0.90 (0.65, 1.25)                    |                               |         | 0.78 (0.48, 1.27)                            |                               |         | 0.95 (0.74, 1.22)                                    |                               |         | 0.53 (-3.07, 4.14)              |                               |         |
| T3                      | 1.17 (0.83, 1.66)                    |                               |         | 1.11 (0.65, 1.87)                            |                               |         | 0.99 (0.75, 1.31)                                    |                               |         | -3.01 (-7.05, 1.03)             |                               |         |
| <b>ΣHMW</b>             |                                      |                               |         |                                              |                               |         |                                                      |                               |         |                                 |                               |         |
| Continuous <sup>d</sup> | 1.05 (0.90, 1.23)                    | 0.07                          | 0.54    | 1.14 (0.90, 1.45)                            | 0.13                          | 0.28    | 0.90 (0.79, 1.03)                                    | 0.12                          | 0.13    | -1.26 (-3.06, 0.55)             | 0.09                          | 0.17    |
| T1                      | 1.00                                 |                               | 0.21    | 1.00                                         |                               | 0.20    | 1.00                                                 |                               | 0.09    | 0.00                            |                               | 0.03    |
| T2                      | 1.46 (1.05, 2.03)                    |                               |         | 1.64 (1.00, 2.69)                            |                               |         | 1.05 (0.82, 1.36)                                    |                               |         | -0.36 (-3.97, 3.24)             |                               |         |
| T3                      | 1.36 (0.95, 1.93)                    |                               |         | 1.57 (0.91, 2.68)                            |                               |         | 0.81 (0.61, 1.08)                                    |                               |         | -4.03 (-8.08, -0.02)            |                               |         |
| <b>MCPP</b>             |                                      |                               |         |                                              |                               |         |                                                      |                               |         |                                 |                               |         |
| Continuous <sup>d</sup> | 1.03 (0.89, 1.20)                    | 0.55                          | 0.68    | 0.98 (0.77, 1.24)                            | 0.20                          | 0.85    | 0.90 (0.80, 1.02)                                    | 0.77                          | 0.11    | -0.49 (-2.32, 1.35)             | 0.15                          | 0.60    |
| T1                      | 1.00                                 |                               | 0.28    | 1.00                                         |                               | 0.94    | 1.00                                                 |                               | 0.92    | 0.00                            |                               | 0.87    |
| T2                      | 1.08 (0.78, 1.49)                    |                               |         | 1.50 (0.93, 2.41)                            |                               |         | 0.91 (0.70, 1.18)                                    |                               |         | -3.59 (-7.19, 0.01)             |                               |         |
| T3                      | 1.21 (0.86, 1.69)                    |                               |         | 1.13 (0.65, 1.94)                            |                               |         | 0.96 (0.73, 1.26)                                    |                               |         | -2.00 (-5.89, 1.90)             |                               |         |
| <b>MBzP</b>             |                                      |                               |         |                                              |                               |         |                                                      |                               |         |                                 |                               |         |
| Continuous <sup>d</sup> | 0.98 (0.86, 1.11)                    | 0.87                          | 0.75    | 1.17 (0.97, 1.41)                            | 0.14                          | 0.10    | 0.97 (0.87, 1.07)                                    | 0.28                          | 0.51    | -0.23 (-1.73, 1.25)             | 0.82                          | 0.75    |
| T1                      | 1.00                                 |                               | 0.63    | 1.00                                         |                               | 0.12    | 1.00                                                 |                               | 0.84    | 0.00                            |                               | 0.86    |
| T2                      | 0.96 (0.71, 1.37)                    |                               |         | 1.51 (0.91, 2.49)                            |                               |         | 1.22 (0.94, 1.58)                                    |                               |         | -1.20 (-4.94, 2.54)             |                               |         |
| T3                      | 1.07 (0.76, 1.51)                    |                               |         | 1.68 (0.98, 2.86)                            |                               |         | 1.06 (0.79, 1.40)                                    |                               |         | -0.79 (-4.79, 3.22)             |                               |         |
| <b>MCNP</b>             |                                      |                               |         |                                              |                               |         |                                                      |                               |         |                                 |                               |         |
| Continuous <sup>d</sup> | 1.10 (0.98, 1.24)                    | 0.05                          | 0.10    | 1.15 (0.97, 1.36)                            | 0.20                          | 0.12    | 0.98 (0.89, 1.08)                                    | 0.62                          | 0.64    | 0.51 (-0.90, 1.92)              | 0.12                          | 0.48    |
| T1                      | 1.00                                 |                               | 0.02    | 1.00                                         |                               | 0.07    | 1.00                                                 |                               | 0.56    | 0.00                            |                               | 0.79    |
| T2                      | 1.05 (0.76, 1.46)                    |                               |         | 1.14 (0.68, 1.89)                            |                               |         | 1.12 (0.87, 1.45)                                    |                               |         | -3.50 (-7.17, 0.17)             |                               |         |
| T3                      | 1.44 (1.03, 2.01)                    |                               |         | 1.54 (0.93, 2.55)                            |                               |         | 1.12 (0.86, 1.47)                                    |                               |         | -0.72 (-4.58, 3.15)             |                               |         |
| <b>MCOP</b>             |                                      |                               |         |                                              |                               |         |                                                      |                               |         |                                 |                               |         |
| Continuous <sup>d</sup> | 1.03 (0.89, 1.20)                    | 0.84                          | 0.67    | 1.04 (0.84, 1.29)                            | 0.75                          | 0.72    | 1.08 (0.96, 1.22)                                    | 0.86                          | 0.19    | -1.17 (-2.77, 0.42)             | 0.64                          | 0.15    |
| T1                      | 1.00                                 |                               | 0.78    | 1.00                                         |                               | 0.71    | 1.00                                                 |                               | 0.87    | 0.00                            |                               | 0.37    |
| T2                      | 1.10 (0.80, 1.51)                    |                               |         | 1.20 (0.74, 1.93)                            |                               |         | 1.07 (0.83, 1.38)                                    |                               |         | -0.36 (-3.92, 3.20)             |                               |         |
| T3                      | 1.07 (0.77, 1.50)                    |                               |         | 1.14 (0.69, 1.90)                            |                               |         | 1.04 (0.79, 1.36)                                    |                               |         | -1.70 (-5.51, 2.10)             |                               |         |
| <b>MEHHP</b>            |                                      |                               |         |                                              |                               |         |                                                      |                               |         |                                 |                               |         |
| Continuous <sup>d</sup> | 1.05 (0.91, 1.20)                    | 0.21                          | 0.54    | 1.07 (0.86, 1.32)                            | 0.32                          | 0.54    | 0.95 (0.85, 1.07)                                    | 0.68                          | 0.41    | -1.12 (-2.64, 0.40)             | 0.06                          | 0.15    |
| T1                      | 1.00                                 |                               | 0.37    | 1.00                                         |                               | 0.66    | 1.00                                                 |                               | 0.87    | 0.00                            |                               | 0.03    |
| T2                      | 1.34 (0.97, 1.85)                    |                               |         | 1.43 (0.89, 2.30)                            |                               |         | 1.10 (0.86, 1.42)                                    |                               |         | -3.14 (-6.61, 0.32)             |                               |         |
| T3                      | 1.25 (0.89, 1.75)                    |                               |         | 1.21 (0.72, 2.04)                            |                               |         | 1.01 (0.77, 1.32)                                    |                               |         | -4.49 (-8.30, -0.68)            |                               |         |
| <b>MEOHP</b>            |                                      |                               |         |                                              |                               |         |                                                      |                               |         |                                 |                               |         |
| Continuous <sup>d</sup> | 1.05 (0.91, 1.21)                    | 0.27                          | 0.51    | 1.07 (0.86, 1.33)                            | 0.55                          | 0.54    | 0.93 (0.83, 1.04)                                    | 0.77                          | 0.21    | -1.42 (-2.98, 0.14)             | 0.25                          | 0.08    |
| T1                      | 1.00                                 |                               | 0.24    | 1.00                                         |                               | 0.72    | 1.00                                                 |                               | 0.48    | 0.00                            |                               | 0.09    |
| T2                      | 1.28 (0.92, 1.77)                    |                               |         | 1.30 (0.81, 2.10)                            |                               |         | 0.98 (0.76, 1.27)                                    |                               |         | -1.03 (-4.64, 2.57)             |                               |         |
| T3                      | 1.28 (0.91, 1.80)                    |                               |         | 1.17 (0.69, 1.98)                            |                               |         | 0.91 (0.70, 1.20)                                    |                               |         | -3.30 (-7.29, 0.69)             |                               |         |
| <b>MECPP</b>            |                                      |                               |         |                                              |                               |         |                                                      |                               |         |                                 |                               |         |
| Continuous <sup>d</sup> | 1.07 (0.92, 1.25)                    | 0.30                          | 0.38    | 1.11 (0.88, 1.40)                            | 0.41                          | 0.37    | 0.92 (0.81, 1.05)                                    | 0.84                          | 0.20    | -1.38 (-3.08, 0.32)             | 0.32                          | 0.11    |
| T1                      | 1.00                                 |                               | 0.57    | 1.00                                         |                               | 0.62    | 1.00                                                 |                               | 0.55    | 0.00                            |                               | 0.15    |
| T2                      | 1.30 (0.93, 1.80)                    |                               |         | 1.40 (0.86, 2.27)                            |                               |         | 0.98 (0.76, 1.27)                                    |                               |         | -1.93 (-5.67, 1.81)             |                               |         |
| T3                      | 1.19 (0.84, 1.70)                    |                               |         | 1.25 (0.74, 2.14)                            |                               |         | 0.92 (0.70, 1.22)                                    |                               |         | -3.10 (-7.15, 0.96)             |                               |         |
| <b>MEHP</b>             |                                      |                               |         |                                              |                               |         |                                                      |                               |         |                                 |                               |         |
| Continuous <sup>d</sup> | 1.01 (0.89, 1.14)                    | 0.43                          | 0.90    | 1.03 (0.85, 1.23)                            | 0.62                          | 0.79    | 0.92 (0.83, 1.01)                                    | 0.52                          | 0.09    | -1.02 (-2.33, 0.28)             | 0.27                          | 0.12    |
| T1                      | 1.00                                 |                               | 0.30    | 1.00                                         |                               | 0.45    | 1.00                                                 |                               | 0.64    | 0.00                            |                               | 0.17    |
| T2                      | 0.93 (0.67, 1.29)                    |                               |         | 0.92 (0.57, 1.49)                            |                               |         | 0.86 (0.67, 1.11)                                    |                               |         | 0.23 (-3.33, 3.80)              |                               |         |
| T3                      | 1.14 (0.82, 1.58)                    |                               |         | 1.16 (0.72, 1.88)                            |                               |         | 0.91 (0.70, 1.19)                                    |                               |         | -3.10 (-6.25, 1.22)             |                               |         |
| <b>ΣDEHP</b>            |                                      |                               |         |                                              |                               |         |                                                      |                               |         |                                 |                               |         |
| Continuous <sup>d</sup> | 1.05 (0.90, 1.22)                    | 0.09                          | 0.52    | 1.08 (0.86, 1.36)                            | 0.23                          | 0.50    | 0.92 (0.82, 1.04)                                    | 0.94                          | 0.20    | -1.38 (-3.02, 0.26)             | 0.24                          | 0.10    |
| T1                      | 1.00                                 |                               | 0.33    | 1.00                                         |                               | 0.60    | 1.00                                                 |                               | 0.78    | 0.00                            |                               | 0.19    |
| T2                      | 1.45 (1.04, 2.01)                    |                               |         | 1.52 (0.94, 2.47)                            |                               |         | 0.96 (0.74, 1.24)                                    |                               |         | -2.71 (-6.28, 0.87)             |                               |         |
| T3                      | 1.30 (0.92, 1.84)                    |                               |         | 1.29 (0.75, 2.20)                            |                               |         | 0.96 (0.73, 1.26)                                    |                               |         | -3.05 (-7.02, 0.91)             |                               |         |

HR = hazard ratio; FEV<sub>1</sub>% = forced expiratory volume in 1 second expressed in percent predicted; CI = confidence interval; ΣLMW = molar sum of Low Molecular Weight phthalates (MEP, MnBP, MiBP); ΣHMW = molar sum of High Molecular Weight phthalates (MCPP, MBzP, MCNP, MCOP, MEHHP, MEOHP, MECPP, MEHP); ΣDEHP = molar sum of di(2-ethylhexyl) phthalate metabolites (MEHHP, MEOHP, MECPP, MEHP). Parent compounds and associated metabolites are detailed in Table S1 (Supplemental material)

<sup>a</sup> Models adjusted for creatinine, centre, residence area, parental history of asthma or allergies, maternal ethnicity, maximal parental education level, maternal or passive smoking during pregnancy, postnatal passive smoking, older siblings, day-care. Missing values in covariates were imputed for at least one covariate in 277 boys, using the MICE multiple imputation method (100 imputations were performed) <sup>b</sup> additionally adjusted for child's height and age.

<sup>c</sup> Crude concentrations.

<sup>d</sup> Estimates for 1 unit increase in ln-transformed standardized concentration.

<sup>e</sup> p-values of heterogeneity test.

Italicized p-values are p-values of monotonic trend test.

**Table S6.** Adjusted associations between pregnancy phenols standardized concentrations and respiratory outcomes (n=447) and FEV<sub>1</sub>% (n=171) in boys from non-smoking mothers.

| Phenol <sup>c</sup>       | Wheezing<br>(until age 5y) <sup>a</sup><br>N = 447 |                               |             | Asthma diagnosis<br>(until age 5y) <sup>a</sup><br>N = 447 |                               |             | Bronchiolitis/Bronchitis<br>(until age 3y) <sup>a</sup><br>N = 447 |                               |             | FEV <sub>1</sub> % <sup>b</sup><br>N = 171 |                               |             |
|---------------------------|----------------------------------------------------|-------------------------------|-------------|------------------------------------------------------------|-------------------------------|-------------|--------------------------------------------------------------------|-------------------------------|-------------|--------------------------------------------|-------------------------------|-------------|
|                           | HR (95% CI)                                        | p <sub>het</sub> <sup>e</sup> | p-value     | HR (95% CI)                                                | p <sub>het</sub> <sup>e</sup> | p-value     | HR (95% CI)                                                        | p <sub>het</sub> <sup>e</sup> | p-value     | beta (95% CI)                              | p <sub>het</sub> <sup>e</sup> | p-value     |
| <b>2,4-Dichlorophenol</b> |                                                    |                               |             |                                                            |                               |             |                                                                    |                               |             |                                            |                               |             |
| Continuous <sup>d</sup>   | 1.04 (0.92, 1.18)                                  |                               | 0.53        | 1.04 (0.86, 1.25)                                          |                               | 0.72        | 0.95 (0.85, 1.06)                                                  |                               | 0.36        | 0.76 (-0.76, 2.28)                         |                               | 0.32        |
| T1                        | 1.00                                               | 0.46                          | <i>0.90</i> | 1.00                                                       | 0.80                          | <i>0.99</i> | 1.00                                                               | 0.58                          | <i>0.30</i> | 0.00                                       | 0.58                          | <i>0.97</i> |
| T2                        | 1.25 (0.88, 1.80)                                  |                               |             | 1.19 (0.70, 2.02)                                          |                               |             | 0.96 (0.72, 1.27)                                                  |                               |             | 2.23 (-2.14, 6.61)                         |                               |             |
| T3                        | 1.11 (0.77, 1.59)                                  |                               |             | 1.06 (0.62, 1.81)                                          |                               |             | 0.86 (0.65, 1.14)                                                  |                               |             | 0.70 (-3.57, 4.97)                         |                               |             |
| <b>2,5-Dichlorophenol</b> |                                                    |                               |             |                                                            |                               |             |                                                                    |                               |             |                                            |                               |             |
| Continuous <sup>d</sup>   | 1.06 (0.98, 1.16)                                  |                               | 0.16        | 1.05 (0.92, 1.20)                                          |                               | 0.46        | 0.98 (0.91, 1.05)                                                  |                               | 0.52        | 0.46 (-0.58, 1.51)                         |                               | 0.38        |
| T1                        | 1.00                                               | 0.02                          | <i>0.29</i> | 1.00                                                       | 0.13                          | <i>0.43</i> | 1.00                                                               | 0.96                          | <i>0.86</i> | 0.00                                       | 0.97                          | <i>0.90</i> |
| T2                        | 1.70 (1.17, 2.48)                                  |                               |             | 1.76 (1.01, 3.05)                                          |                               |             | 1.03 (0.77, 1.38)                                                  |                               |             | 0.54 (-3.79, 4.87)                         |                               |             |
| T3                        | 1.46 (1.01, 2.12)                                  |                               |             | 1.50 (0.86, 2.62)                                          |                               |             | 0.99 (0.74, 1.32)                                                  |                               |             | 0.43 (-3.84, 4.70)                         |                               |             |
| <b>∑Dichlorophenols</b>   |                                                    |                               |             |                                                            |                               |             |                                                                    |                               |             |                                            |                               |             |
| Continuous <sup>d</sup>   | 1.06 (0.97, 1.16)                                  |                               | 0.19        | 1.05 (0.91, 1.20)                                          |                               | 0.52        | 0.97 (0.90, 1.05)                                                  |                               | 0.48        | 0.51 (-0.58, 1.60)                         |                               | 0.36        |
| T1                        | 1.00                                               | 0.11                          | <i>0.43</i> | 1.00                                                       | 0.11                          | <i>0.54</i> | 1.00                                                               | 0.92                          | <i>1.00</i> | 0.00                                       | 0.97                          | <i>0.99</i> |
| T2                        | 1.48 (1.02, 2.15)                                  |                               |             | 1.80 (1.04, 3.12)                                          |                               |             | 1.06 (0.79, 1.42)                                                  |                               |             | 0.52 (-3.77, 4.80)                         |                               |             |
| T3                        | 1.32 (0.92, 1.91)                                  |                               |             | 1.45 (0.83, 2.54)                                          |                               |             | 1.02 (0.77, 1.36)                                                  |                               |             | 0.16 (-4.10, 4.42)                         |                               |             |
| <b>Bisphenol A</b>        |                                                    |                               |             |                                                            |                               |             |                                                                    |                               |             |                                            |                               |             |
| Continuous <sup>d</sup>   | 1.02 (0.83, 1.24)                                  |                               | 0.87        | 1.23 (0.93, 1.62)                                          |                               | 0.15        | 1.16 (0.98, 1.37)                                                  |                               | 0.08        | -0.25 (-2.43, 1.93)                        |                               | 0.82        |
| T1                        | 1.00                                               | 0.70                          | <i>0.43</i> | 1.00                                                       | 0.26                          | <i>0.10</i> | 1.00                                                               | 0.38                          | <i>0.20</i> | 0.00                                       | 0.60                          | <i>0.35</i> |
| T2                        | 1.11 (0.77, 1.59)                                  |                               |             | 1.14 (0.63, 2.05)                                          |                               |             | 1.00 (0.75, 1.33)                                                  |                               |             | -1.92 (-6.12, 2.28)                        |                               |             |
| T3                        | 1.17 (0.81, 1.69)                                  |                               |             | 1.54 (0.89, 2.66)                                          |                               |             | 1.19 (0.89, 1.58)                                                  |                               |             | -1.86 (-6.18, 2.46)                        |                               |             |
| <b>Benzophenone-3</b>     |                                                    |                               |             |                                                            |                               |             |                                                                    |                               |             |                                            |                               |             |
| Continuous <sup>d</sup>   | 0.95 (0.87, 1.04)                                  |                               | 0.29        | 1.00 (0.88, 1.14)                                          |                               | 0.99        | 0.99 (0.93, 1.07)                                                  |                               | 0.88        | -0.58 (-1.60, 0.44)                        |                               | 0.26        |
| T1                        | 1.00                                               | 0.11                          | <i>0.15</i> | 1.00                                                       | 0.14                          | <i>0.52</i> | 1.00                                                               | 0.94                          | <i>0.75</i> | 0.00                                       | 0.36                          | <i>0.40</i> |
| T2                        | 0.75 (0.53, 1.07)                                  |                               |             | 0.59 (0.35, 1.02)                                          |                               |             | 0.98 (0.74, 1.31)                                                  |                               |             | -2.59 (-6.81, 1.62)                        |                               |             |
| T3                        | 0.69 (0.48, 1.00)                                  |                               |             | 0.69 (0.40, 1.16)                                          |                               |             | 0.95 (0.71, 1.27)                                                  |                               |             | -2.73 (-6.97, 1.51)                        |                               |             |
| <b>Triclosan</b>          |                                                    |                               |             |                                                            |                               |             |                                                                    |                               |             |                                            |                               |             |
| Continuous <sup>d</sup>   | 0.99 (0.94, 1.05)                                  |                               | 0.78        | 0.99 (0.91, 1.08)                                          |                               | 0.79        | 1.01 (0.96, 1.05)                                                  |                               | 0.77        | 0.08 (-0.61, 0.76)                         |                               | 0.83        |
| T1                        | 1.00                                               | 0.77                          | <i>0.48</i> | 1.00                                                       | 0.71                          | <i>0.44</i> | 1.00                                                               | 0.53                          | <i>0.71</i> | 0.00                                       | 0.92                          | <i>0.69</i> |
| T2                        | 0.96 (0.68, 1.37)                                  |                               |             | 1.06 (0.64, 1.75)                                          |                               |             | 1.16 (0.87, 1.53)                                                  |                               |             | -0.03 (-4.18, 4.12)                        |                               |             |
| T3                        | 0.88 (0.62, 1.25)                                  |                               |             | 0.84 (0.49, 1.46)                                          |                               |             | 1.01 (0.76, 1.34)                                                  |                               |             | 0.71 (-3.50, 4.99)                         |                               |             |
| <b>Methyl-paraben</b>     |                                                    |                               |             |                                                            |                               |             |                                                                    |                               |             |                                            |                               |             |
| Continuous <sup>d</sup>   | 0.91 (0.83, 1.00)                                  |                               | 0.05        | 0.98 (0.85, 1.12)                                          |                               | 0.72        | 0.96 (0.89, 1.03)                                                  |                               | 0.24        | -0.48 (-1.45, 0.49)                        |                               | 0.33        |
| T1                        | 1.00                                               | 0.09                          | <i>0.24</i> | 1.00                                                       | 0.92                          | <i>0.93</i> | 1.00                                                               | 0.12                          | <i>0.09</i> | 0.00                                       | 0.24                          | <i>0.18</i> |
| T2                        | 0.70 (0.49, 0.99)                                  |                               |             | 1.12 (0.66, 1.89)                                          |                               |             | 0.81 (0.61, 1.07)                                                  |                               |             | 1.62 (-2.59, 5.82)                         |                               |             |
| T3                        | 0.75 (0.53, 1.06)                                  |                               |             | 1.05 (0.61, 1.82)                                          |                               |             | 0.75 (0.56, 1.00)                                                  |                               |             | -1.98 (-6.02, 2.07)                        |                               |             |
| <b>Ethyl-paraben</b>      |                                                    |                               |             |                                                            |                               |             |                                                                    |                               |             |                                            |                               |             |
| Continuous <sup>d</sup>   | 0.99 (0.93, 1.07)                                  |                               | 0.88        | 1.10 (0.99, 1.23)                                          |                               | 0.08        | 1.00 (0.96, 1.06)                                                  |                               | 0.98        | -0.57 (-1.32, 0.19)                        |                               | 0.14        |
| T1                        | 1.00                                               | 0.82                          | <i>0.53</i> | 1.00                                                       | 0.08                          | <i>0.05</i> | 1.00                                                               | 0.03                          | <i>0.38</i> | 0.00                                       | 0.55                          | <i>0.28</i> |
| T2                        | 1.04 (0.72, 1.49)                                  |                               |             | 1.47 (0.83, 2.60)                                          |                               |             | 1.41 (1.06, 1.87)                                                  |                               |             | -0.35 (-4.56, 3.87)                        |                               |             |
| T3                        | 1.12 (0.78, 1.62)                                  |                               |             | 1.91 (1.08, 3.37)                                          |                               |             | 1.03 (0.76, 1.39)                                                  |                               |             | -2.11 (-6.26, 2.04)                        |                               |             |
| <b>Propyl-paraben</b>     |                                                    |                               |             |                                                            |                               |             |                                                                    |                               |             |                                            |                               |             |
| Continuous <sup>d</sup>   | 0.97 (0.90, 1.04)                                  |                               | 0.40        | 1.01 (0.90, 1.14)                                          |                               | 0.83        | 0.96 (0.91, 1.03)                                                  |                               | 0.25        | -0.30 (-1.11, 0.52)                        |                               | 0.47        |
| T1                        | 1.00                                               | 0.71                          | <i>0.57</i> | 1.00                                                       | 0.75                          | <i>0.97</i> | 1.00                                                               | 0.34                          | <i>0.17</i> | 0.00                                       | 0.91                          | <i>0.86</i> |
| T2                        | 1.09 (0.77, 1.55)                                  |                               |             | 1.22 (0.72, 2.07)                                          |                               |             | 0.91 (0.69, 1.20)                                                  |                               |             | -0.91 (-5.03, 3.20)                        |                               |             |
| T3                        | 0.94 (0.66, 1.35)                                  |                               |             | 1.08 (0.63, 1.86)                                          |                               |             | 0.81 (0.61, 1.07)                                                  |                               |             | -0.57 (-4.71, 3.56)                        |                               |             |
| <b>Butyl-paraben</b>      |                                                    |                               |             |                                                            |                               |             |                                                                    |                               |             |                                            |                               |             |
| Continuous <sup>d</sup>   | 0.97 (0.90, 1.05)                                  |                               | 0.45        | 1.00 (0.89, 1.11)                                          |                               | 0.93        | 0.98 (0.93, 1.04)                                                  |                               | 0.56        | -0.43 (-1.23, 0.37)                        |                               | 0.29        |
| T1                        | 1.00                                               | 0.34                          | <i>0.35</i> | 1.00                                                       | 0.67                          | <i>0.85</i> | 1.00                                                               | 0.08                          | <i>0.08</i> | 0.00                                       | 0.47                          | <i>0.34</i> |
| T2                        | 1.21 (0.85, 1.73)                                  |                               |             | 1.28 (0.75, 2.19)                                          |                               |             | 1.20 (0.90, 1.60)                                                  |                               |             | -1.72 (-5.85, 2.41)                        |                               |             |
| T3                        | 0.94 (0.64, 1.38)                                  |                               |             | 1.19 (0.67, 2.12)                                          |                               |             | 0.87 (0.64, 1.17)                                                  |                               |             | -2.56 (-6.74, 1.62)                        |                               |             |
| <b>∑Parabens</b>          |                                                    |                               |             |                                                            |                               |             |                                                                    |                               |             |                                            |                               |             |
| Continuous <sup>d</sup>   | 0.91 (0.83, 1.00)                                  |                               | 0.04        | 0.98 (0.85, 1.13)                                          |                               | 0.79        | 0.96 (0.89, 1.03)                                                  |                               | 0.26        | -0.45 (-1.43, 0.52)                        |                               | 0.36        |
| T1                        | 1.00                                               | 0.15                          | <i>0.16</i> | 1.00                                                       | 0.82                          | <i>0.67</i> | 1.00                                                               | 0.18                          | <i>0.27</i> | 0.00                                       | 0.52                          | <i>0.31</i> |
| T2                        | 0.75 (0.53, 1.07)                                  |                               |             | 1.10 (0.66, 1.83)                                          |                               |             | 0.79 (0.60, 1.05)                                                  |                               |             | 0.73 (-3.48, 4.95)                         |                               |             |
| T3                        | 0.73 (0.51, 1.05)                                  |                               |             | 0.92 (0.53, 1.60)                                          |                               |             | 0.81 (0.61, 1.07)                                                  |                               |             | -1.63 (-5.70, 2.44)                        |                               |             |

HR = hazard ratio; FEV<sub>1</sub>% = forced expiratory volume in 1 second expressed in percent predicted; CI = confidence interval; ∑Dichlorophenols = molar sum of 2-Dichlorophenols (2,4-, 2,5-dichlorophenols); ∑Parabens = molar sum of parabens (Methyl-, Ethyl-, Propyl-, Butyl-parabens).

<sup>a</sup> Models adjusted for centre, residence area, parental history of asthma or allergies, maternal ethnicity, maximal parental education level, passive smoking during pregnancy, postnatal passive smoking, older siblings, day-care. Missing values in covariates were imputed using the MICE multiple imputation method (100 imputations were performed) <sup>b</sup> additionally adjusted for child's height and age.

<sup>c</sup> Standardized for urine sampling conditions (creatinine level, day and hour of sampling, gestational age, storage duration at room temperature and year of analysis), as detailed in Mortamais et al. (2012).

<sup>d</sup> Estimates for 1 unit increase in ln-transformed standardized concentration.

<sup>e</sup> p-values of heterogeneity test.

Italicized p-values are p-values of monotonic trend test.



**Table S7.** Adjusted associations between pregnancy phthalate metabolites standardized concentrations and respiratory outcomes (n=447) and FEV<sub>1</sub>% (n=171) in boys from non-smoking mothers.

| Phthalate <sup>c</sup>  | Wheezing (until age 5y) <sup>a</sup> |                               |         | Asthma diagnosis (until age 5y) <sup>a</sup> |                               |         | Bronchiolitis/Bronchitis (until age 3y) <sup>a</sup> |                               |         | FEV <sub>1</sub> % <sup>b</sup> |                               |         |
|-------------------------|--------------------------------------|-------------------------------|---------|----------------------------------------------|-------------------------------|---------|------------------------------------------------------|-------------------------------|---------|---------------------------------|-------------------------------|---------|
|                         | HR (95% CI)                          | p <sub>het</sub> <sup>e</sup> | p-value | HR (95% CI)                                  | p <sub>het</sub> <sup>e</sup> | p-value | HR (95% CI)                                          | p <sub>het</sub> <sup>e</sup> | p-value | beta (95% CI)                   | p <sub>het</sub> <sup>e</sup> | p-value |
|                         | N = 447                              |                               |         | N = 447                                      |                               |         | N = 447                                              |                               |         | N = 171                         |                               |         |
| <b>ΣLMW</b>             |                                      |                               |         |                                              |                               |         |                                                      |                               |         |                                 |                               |         |
| Continuous <sup>d</sup> | 0.93 (0.78, 1.11)                    |                               |         | 1.01 (0.78, 1.32)                            |                               |         | 1.05 (0.91, 1.21)                                    |                               |         | -0.13 (-2.36, 2.10)             |                               |         |
| T1                      | 1.00                                 | 0.74                          | 0.89    | 1.00                                         | 0.05                          | 0.93    | 1.00                                                 | 0.64                          | 0.36    | 0.00                            | 0.64                          | 0.91    |
| T2                      | 1.15 (0.81, 1.64)                    |                               |         | 1.84 (1.09, 3.10)                            |                               |         | 1.07 (0.80, 1.43)                                    |                               |         | -0.56 (-4.77, 3.65)             |                               |         |
| T3                      | 1.06 (0.74, 1.52)                    |                               |         | 1.18 (0.66, 2.12)                            |                               |         | 1.15 (0.86, 1.52)                                    |                               |         | -1.93 (-6.02, 2.17)             |                               |         |
| <b>MEP</b>              |                                      |                               |         |                                              |                               |         |                                                      |                               |         |                                 |                               |         |
| Continuous <sup>d</sup> | 0.97 (0.84, 1.11)                    |                               |         | 1.10 (0.90, 1.34)                            |                               |         | 1.03 (0.92, 1.15)                                    |                               |         | -0.37 (-2.11, 1.37)             |                               |         |
| T1                      | 1.00                                 | 0.97                          | 0.87    | 1.00                                         | 0.55                          | 0.36    | 1.00                                                 | 0.92                          | 0.68    | 0.00                            | 0.77                          | 0.67    |
| T2                      | 0.98 (0.69, 1.39)                    |                               |         | 1.25 (0.72, 2.15)                            |                               |         | 1.01 (0.76, 1.35)                                    |                               |         | 0.81 (-3.26, 4.50)              |                               |         |
| T3                      | 1.02 (0.71, 1.46)                    |                               |         | 1.34 (0.78, 2.32)                            |                               |         | 1.06 (0.80, 1.41)                                    |                               |         | -0.69 (-4.91, 3.53)             |                               |         |
| <b>MnBP</b>             |                                      |                               |         |                                              |                               |         |                                                      |                               |         |                                 |                               |         |
| Continuous <sup>d</sup> | 1.04 (0.91, 1.19)                    |                               |         | 1.01 (0.83, 1.24)                            |                               |         | 1.03 (0.92, 1.15)                                    |                               |         | 0.22 (-1.36, 1.79)              |                               |         |
| T1                      | 1.00                                 | 0.73                          | 0.47    | 1.00                                         | 0.71                          | 0.91    | 1.00                                                 | 0.93                          | 0.84    | 0.00                            | 0.93                          | 0.75    |
| T2                      | 0.97 (0.67, 1.39)                    |                               |         | 1.23 (0.73, 2.08)                            |                               |         | 0.95 (0.72, 1.27)                                    |                               |         | 0.09 (-4.14, 4.31)              |                               |         |
| T3                      | 1.11 (0.78, 1.58)                    |                               |         | 1.04 (0.60, 1.81)                            |                               |         | 0.96 (0.72, 1.27)                                    |                               |         | -0.64 (-4.88, 3.60)             |                               |         |
| <b>MiBP</b>             |                                      |                               |         |                                              |                               |         |                                                      |                               |         |                                 |                               |         |
| Continuous <sup>d</sup> | 0.95 (0.79, 1.14)                    |                               |         | 1.01 (0.77, 1.33)                            |                               |         | 0.98 (0.84, 1.14)                                    |                               |         | -0.51 (-2.62, 1.60)             |                               |         |
| T1                      | 1.00                                 | 0.83                          | 0.94    | 1.00                                         | 0.64                          | 0.92    | 1.00                                                 | 1.00                          | 0.95    | 0.00                            | 0.46                          | 0.63    |
| T2                      | 0.89 (0.62, 1.29)                    |                               |         | 1.21 (0.71, 2.06)                            |                               |         | 1.00 (0.75, 1.34)                                    |                               |         | -0.11 (-4.34, 4.11)             |                               |         |
| T3                      | 0.96 (0.67, 1.37)                    |                               |         | 0.95 (0.55, 1.64)                            |                               |         | 1.01 (0.75, 1.35)                                    |                               |         | -2.28 (-6.36, 1.80)             |                               |         |
| <b>ΣHMW</b>             |                                      |                               |         |                                              |                               |         |                                                      |                               |         |                                 |                               |         |
| Continuous <sup>d</sup> | 1.08 (0.90, 1.29)                    |                               |         | 1.12 (0.84, 1.48)                            |                               |         | 0.92 (0.78, 1.07)                                    |                               |         | -0.79 (-2.99, 1.41)             |                               |         |
| T1                      | 1.00                                 | 0.28                          | 0.64    | 1.00                                         | 0.64                          | 0.45    | 1.00                                                 | 0.85                          | 0.68    | 0.00                            | 0.65                          | 0.61    |
| T2                      | 1.34 (0.93, 1.92)                    |                               |         | 0.91 (0.53, 1.58)                            |                               |         | 1.04 (0.78, 1.37)                                    |                               |         | -1.96 (-6.19, 2.27)             |                               |         |
| T3                      | 1.16 (0.80, 1.68)                    |                               |         | 1.17 (0.69, 1.97)                            |                               |         | 0.95 (0.71, 1.27)                                    |                               |         | -1.23 (-5.39, 2.93)             |                               |         |
| <b>MCPP</b>             |                                      |                               |         |                                              |                               |         |                                                      |                               |         |                                 |                               |         |
| Continuous <sup>d</sup> | 0.98 (0.82, 1.17)                    |                               |         | 0.94 (0.72, 1.23)                            |                               |         | 0.92 (0.79, 1.06)                                    |                               |         | 0.08 (-2.08, 2.25)              |                               |         |
| T1                      | 1.00                                 | 0.99                          | 0.90    | 1.00                                         | 0.87                          | 0.65    | 1.00                                                 | 0.18                          | 0.25    | 0.00                            | 0.75                          | 0.94    |
| T2                      | 0.99 (0.69, 1.40)                    |                               |         | 0.93 (0.55, 1.58)                            |                               |         | 1.11 (0.84, 1.46)                                    |                               |         | -0.95 (-5.14, 3.23)             |                               |         |
| T3                      | 0.98 (0.68, 1.40)                    |                               |         | 0.87 (0.50, 1.49)                            |                               |         | 0.85 (0.63, 1.14)                                    |                               |         | 0.28 (-3.87, 4.83)              |                               |         |
| <b>MBzP</b>             |                                      |                               |         |                                              |                               |         |                                                      |                               |         |                                 |                               |         |
| Continuous <sup>d</sup> | 1.01 (0.87, 1.17)                    |                               |         | 1.22 (0.99, 1.51)                            |                               |         | 0.96 (0.85, 1.08)                                    |                               |         | 0.20 (-1.62, 2.01)              |                               |         |
| T1                      | 1.00                                 | 0.80                          | 1.00    | 1.00                                         | 0.28                          | 0.06    | 1.00                                                 | 0.67                          | 0.39    | 0.00                            | 0.10                          | 0.83    |
| T2                      | 1.13 (0.78, 1.62)                    |                               |         | 1.56 (0.88, 2.77)                            |                               |         | 1.00 (0.75, 1.33)                                    |                               |         | -4.34 (-8.55, -0.13)            |                               |         |
| T3                      | 1.03 (0.72, 1.49)                    |                               |         | 1.42 (0.82, 2.47)                            |                               |         | 0.89 (0.67, 1.19)                                    |                               |         | -3.39 (-7.52, 0.73)             |                               |         |
| <b>MCNP</b>             |                                      |                               |         |                                              |                               |         |                                                      |                               |         |                                 |                               |         |
| Continuous <sup>d</sup> | 1.04 (0.90, 1.19)                    |                               |         | 0.99 (0.80, 1.22)                            |                               |         | 0.93 (0.82, 1.04)                                    |                               |         | 1.36 (-0.28, 3.01)              |                               |         |
| T1                      | 1.00                                 | 0.70                          | 0.40    | 1.00                                         | 0.24                          | 0.91    | 1.00                                                 | 0.95                          | 0.88    | 0.00                            | 0.09                          | 0.19    |
| T2                      | 1.02 (0.71, 1.46)                    |                               |         | 1.60 (0.92, 2.80)                            |                               |         | 0.95 (0.72, 1.27)                                    |                               |         | -2.71 (6.83, 1.41)              |                               |         |
| T3                      | 1.15 (0.81, 1.64)                    |                               |         | 1.43 (0.82, 2.49)                            |                               |         | 0.97 (0.73, 1.28)                                    |                               |         | 1.97 (-2.21, 6.14)              |                               |         |
| <b>MCOP</b>             |                                      |                               |         |                                              |                               |         |                                                      |                               |         |                                 |                               |         |
| Continuous <sup>d</sup> | 0.97 (0.82, 1.16)                    |                               |         | 0.95 (0.73, 1.22)                            |                               |         | 1.06 (0.93, 1.22)                                    |                               |         | -1.29 (-3.10, 0.53)             |                               |         |
| T1                      | 1.00                                 | 0.50                          | 0.31    | 1.00                                         | 0.62                          | 0.67    | 1.00                                                 | 0.33                          | 0.37    | 0.00                            | 0.46                          | 0.16    |
| T2                      | 0.86 (0.60, 1.22)                    |                               |         | 0.76 (0.44, 1.31)                            |                               |         | 1.21 (0.91, 1.61)                                    |                               |         | -2.54 (-6.75, 1.68)             |                               |         |
| T3                      | 0.81 (0.57, 1.16)                    |                               |         | 0.89 (0.53, 1.50)                            |                               |         | 1.01 (0.75, 1.36)                                    |                               |         | -1.89 (-6.03, 2.25)             |                               |         |
| <b>MEHHP</b>            |                                      |                               |         |                                              |                               |         |                                                      |                               |         |                                 |                               |         |
| Continuous <sup>d</sup> | 1.09 (0.92, 1.28)                    |                               |         | 1.04 (0.80, 1.34)                            |                               |         | 0.97 (0.85, 1.11)                                    |                               |         | -0.67 (-2.57, 1.23)             |                               |         |
| T1                      | 1.00                                 | 0.37                          | 0.21    | 1.00                                         | 0.93                          | 0.78    | 1.00                                                 | 0.89                          | 0.94    | 0.00                            | 0.63                          | 0.63    |
| T2                      | 1.22 (0.84, 1.75)                    |                               |         | 1.07 (0.63, 1.83)                            |                               |         | 1.06 (0.80, 1.41)                                    |                               |         | -1.98 (-6.04, 2.08)             |                               |         |
| T3                      | 1.29 (0.90, 1.85)                    |                               |         | 0.97 (0.56, 1.67)                            |                               |         | 1.00 (0.75, 1.34)                                    |                               |         | -1.14 (-5.37, 3.10)             |                               |         |
| <b>MEOHP</b>            |                                      |                               |         |                                              |                               |         |                                                      |                               |         |                                 |                               |         |
| Continuous <sup>d</sup> | 1.08 (0.92, 1.28)                    |                               |         | 1.05 (0.81, 1.36)                            |                               |         | 0.95 (0.83, 1.09)                                    |                               |         | -1.06 (-3.01, 0.89)             |                               |         |
| T1                      | 1.00                                 | 0.48                          | 0.31    | 1.00                                         | 0.69                          | 0.70    | 1.00                                                 | 0.95                          | 0.92    | 0.00                            | 0.43                          | 0.29    |
| T2                      | 1.20 (0.83, 1.72)                    |                               |         | 0.81 (0.47, 1.40)                            |                               |         | 1.05 (0.79, 1.39)                                    |                               |         | -2.04 (-6.17, 2.10)             |                               |         |
| T3                      | 1.24 (0.86, 1.78)                    |                               |         | 1.00 (0.59, 1.68)                            |                               |         | 1.02 (0.77, 1.36)                                    |                               |         | -2.63 (-6.87, 1.60)             |                               |         |
| <b>MECPP</b>            |                                      |                               |         |                                              |                               |         |                                                      |                               |         |                                 |                               |         |
| Continuous <sup>d</sup> | 1.05 (0.88, 1.25)                    |                               |         | 1.07 (0.82, 1.41)                            |                               |         | 0.95 (0.82, 1.10)                                    |                               |         | -1.15 (-3.17, 0.86)             |                               |         |
| T1                      | 1.00                                 | 0.40                          | 0.36    | 1.00                                         | 0.97                          | 0.60    | 1.00                                                 | 0.96                          | 0.48    | 0.00                            | 0.12                          | 0.26    |
| T2                      | 1.26 (0.88, 1.81)                    |                               |         | 1.04 (0.60, 1.79)                            |                               |         | 1.00 (0.75, 1.33)                                    |                               |         | -2.35 (-6.48, 1.78)             |                               |         |
| T3                      | 1.23 (0.85, 1.77)                    |                               |         | 1.07 (0.63, 1.83)                            |                               |         | 1.04 (0.78, 1.38)                                    |                               |         | -4.24 (-8.30, -0.18)            |                               |         |
| <b>MEHP</b>             |                                      |                               |         |                                              |                               |         |                                                      |                               |         |                                 |                               |         |
| Continuous <sup>d</sup> | 1.05 (0.91, 1.22)                    |                               |         | 1.00 (0.81, 1.25)                            |                               |         | 0.95 (0.84, 1.06)                                    |                               |         | -1.08 (-2.70, 0.53)             |                               |         |
| T1                      | 1.00                                 | 0.68                          | 0.40    | 1.00                                         | 0.69                          | 0.97    | 1.00                                                 | 0.70                          | 0.54    | 0.00                            | 0.49                          | 0.19    |
| T2                      | 1.09 (0.76, 1.57)                    |                               |         | 0.84 (0.49, 1.44)                            |                               |         | 0.90 (0.68, 1.20)                                    |                               |         | 0.25 (-3.94, 4.43)              |                               |         |
| T3                      | 1.17 (0.82, 1.67)                    |                               |         | 1.05 (0.63, 1.76)                            |                               |         | 0.90 (0.68, 1.20)                                    |                               |         | -2.05 (-6.20, 2.11)             |                               |         |
| <b>ΣDEHP</b>            |                                      |                               |         |                                              |                               |         |                                                      |                               |         |                                 |                               |         |
| Continuous <sup>d</sup> | 1.07 (0.90, 1.28)                    |                               |         | 1.05 (0.80, 1.37)                            |                               |         | 0.95 (0.82, 1.09)                                    |                               |         | -1.04 (-3.03, 0.96)             |                               |         |
| T1                      | 1.00                                 | 0.30                          | 0.40    | 1.00                                         | 0.97                          | 0.72    | 1.00                                                 | 0.89                          | 0.90    | 0.00                            | 0.44                          | 0.30    |
| T2                      | 1.32 (0.92, 1.90)                    |                               |         | 0.95 (0.56, 1.63)                            |                               |         | 1.06 (0.80, 1.41)                                    |                               |         | -2.53 (-6.61, 1.54)             |                               |         |
| T3                      | 1.23 (0.85, 1.77)                    |                               |         | 1.01 (0.60, 1.71)                            |                               |         | 0.99 (0.75, 1.33)                                    |                               |         | -1.98 (-6.15, 2.19)             |                               |         |

HR = hazard ratio; FEV<sub>1</sub>% = forced expiratory volume in 1 second expressed in percent predicted; CI = confidence interval; ΣLMW = molar sum of Low Molecular Weight phthalates (MEP, MnBP, MiBP); ΣHMW = molar sum of High Molecular Weight phthalates (MCPP, MBzP, MCNP, MCOP, MEHHP, MEOHP, MECPP, MEHP); ΣDEHP = molar sum of di(2-ethylhexyl) phthalate metabolites (MEHHP, MEOHP, MECPP, MEHP). Parent compounds and associated metabolites are detailed in Table S1 (Supplemental material)

<sup>a</sup> Models adjusted for centre, residence area, parental history of asthma or allergies, maternal ethnicity, maximal parental education level, passive smoking during pregnancy, postnatal passive smoking, older siblings, day-care. Missing values in covariates were imputed using the MICE multiple imputation method (100 imputations were performed) <sup>b</sup> additionally adjusted for child's height and age.

<sup>c</sup> Standardized for urine sampling conditions (creatinine level, day and hour of sampling, gestational age, storage duration at room temperature and year of analysis), as detailed in Mortamais et al. (2012).

<sup>d</sup> Estimates for 1 unit increase in ln-transformed standardized concentration.

<sup>e</sup> p-values of heterogeneity test.

Italicized p-values are p-values of monotonic trend test.

**Table S8.** Adjusted associations between pregnancy phenols standardized concentrations and respiratory outcomes (n=470) and FEV<sub>1</sub>% (n=185) in boys from non-asthmatic parents.

| Phenol <sup>c</sup>       | Wheezing<br>(until age 5y) <sup>a</sup><br>N = 470 |                               |             | Asthma diagnosis<br>(until age 5y) <sup>a</sup><br>N = 470 |                               |             | Bronchiolitis/Bronchitis<br>(until age 3y) <sup>a</sup><br>N = 470 |                               |             | FEV <sub>1</sub> % <sup>b</sup><br>N = 185 |                               |             |
|---------------------------|----------------------------------------------------|-------------------------------|-------------|------------------------------------------------------------|-------------------------------|-------------|--------------------------------------------------------------------|-------------------------------|-------------|--------------------------------------------|-------------------------------|-------------|
|                           | HR (95% CI)                                        | p <sub>het</sub> <sup>e</sup> | p-value     | HR (95% CI)                                                | p <sub>het</sub> <sup>e</sup> | p-value     | HR (95% CI)                                                        | p <sub>het</sub> <sup>e</sup> | p-value     | beta (95% CI)                              | p <sub>het</sub> <sup>e</sup> | p-value     |
| <b>2,4-Dichlorophenol</b> |                                                    |                               |             |                                                            |                               |             |                                                                    |                               |             |                                            |                               |             |
| Continuous <sup>d</sup>   | 1.06 (0.94, 1.20)                                  |                               | 0.36        | 0.95 (0.78, 1.16)                                          |                               | 0.62        | 0.95 (0.86, 1.06)                                                  |                               | 0.38        | -0.30 (-1.77, 1.17)                        |                               | 0.69        |
| T1                        | 1.00                                               | 0.73                          | <i>0.91</i> | 1.00                                                       | 0.34                          | <i>0.38</i> | 1.00                                                               | 0.52                          | <i>0.34</i> | 0.00                                       | 0.91                          | <i>0.76</i> |
| T2                        | 1.15 (0.81, 1.63)                                  |                               |             | 1.28 (0.76, 2.14)                                          |                               |             | 1.06 (0.80, 1.39)                                                  |                               |             | -0.73 (-4.73, 3.28)                        |                               |             |
| T3                        | 1.06 (0.75, 1.51)                                  |                               |             | 0.86 (0.49, 1.49)                                          |                               |             | 0.90 (0.69, 1.18)                                                  |                               |             | -0.84 (-4.81, 3.14)                        |                               |             |
| <b>2,5-Dichlorophenol</b> |                                                    |                               |             |                                                            |                               |             |                                                                    |                               |             |                                            |                               |             |
| Continuous <sup>d</sup>   | 1.08 (0.99, 1.18)                                  |                               | 0.08        | 1.01 (0.88, 1.16)                                          |                               | 0.86        | 0.99 (0.92, 1.07)                                                  |                               | 0.86        | -0.02 (-1.00, 1.03)                        |                               | 0.97        |
| T1                        | 1.00                                               | 0.11                          | <i>0.22</i> | 1.00                                                       | 0.23                          | <i>0.43</i> | 1.00                                                               | 0.76                          | <i>0.58</i> | 0.00                                       | 0.96                          | <i>0.78</i> |
| T2                        | 1.42 (0.99, 2.03)                                  |                               |             | 1.59 (0.91, 2.76)                                          |                               |             | 1.08 (0.82, 1.44)                                                  |                               |             | 0.06 (-3.91, 4.03)                         |                               |             |
| T3                        | 1.40 (0.98, 2.00)                                  |                               |             | 1.46 (0.84, 2.54)                                          |                               |             | 1.11 (0.84, 1.46)                                                  |                               |             | 0.50 (-3.42, 4.42)                         |                               |             |
| <b>∑Dichlorophenols</b>   |                                                    |                               |             |                                                            |                               |             |                                                                    |                               |             |                                            |                               |             |
| Continuous <sup>d</sup>   | 1.08 (0.99, 1.18)                                  |                               | 0.10        | 1.00 (0.87, 1.16)                                          |                               | 0.95        | 0.99 (0.92, 1.07)                                                  |                               | 0.80        | -0.02 (-1.09, 1.04)                        |                               | 0.97        |
| T1                        | 1.00                                               | 0.11                          | <i>0.16</i> | 1.00                                                       | 0.20                          | <i>0.28</i> | 1.00                                                               | 0.79                          | <i>0.49</i> | 0.00                                       | 0.99                          | <i>0.91</i> |
| T2                        | 1.39 (0.97, 1.99)                                  |                               |             | 1.57 (0.90, 2.75)                                          |                               |             | 1.02 (0.77, 1.35)                                                  |                               |             | 0.21 (-3.77, 4.19)                         |                               |             |
| T3                        | 1.42 (1.00, 2.02)                                  |                               |             | 1.54 (0.89, 2.68)                                          |                               |             | 1.10 (0.83, 1.45)                                                  |                               |             | 0.27 (-3.67, 4.21)                         |                               |             |
| <b>Bisphenol A</b>        |                                                    |                               |             |                                                            |                               |             |                                                                    |                               |             |                                            |                               |             |
| Continuous <sup>d</sup>   | 0.94 (0.77, 1.15)                                  |                               | 0.56        | 1.25 (0.93, 1.66)                                          |                               | 0.14        | 1.11 (0.95, 1.29)                                                  |                               | 0.18        | -1.40 (-3.47, 0.67)                        |                               | 0.18        |
| T1                        | 1.00                                               | 0.86                          | <i>0.84</i> | 1.00                                                       | 0.47                          | <i>0.22</i> | 1.00                                                               | 0.50                          | <i>0.26</i> | 0.00                                       | 0.45                          | <i>0.25</i> |
| T2                        | 0.91 (0.64, 1.28)                                  |                               |             | 1.12 (0.63, 1.98)                                          |                               |             | 1.10 (0.83, 1.45)                                                  |                               |             | -1.79 (-5.69, 2.10)                        |                               |             |
| T3                        | 0.95 (0.66, 1.34)                                  |                               |             | 1.38 (0.80, 2.39)                                          |                               |             | 1.18 (0.89, 1.57)                                                  |                               |             | -2.49 (-6.47, 1.49)                        |                               |             |
| <b>Benzophenone-3</b>     |                                                    |                               |             |                                                            |                               |             |                                                                    |                               |             |                                            |                               |             |
| Continuous <sup>d</sup>   | 0.95 (0.87, 1.03)                                  |                               | 0.21        | 0.96 (0.84, 1.10)                                          |                               | 0.57        | 1.00 (0.93, 1.07)                                                  |                               | 0.97        | -0.80 (-1.82, 0.22)                        |                               | 0.12        |
| T1                        | 1.00                                               | 0.13                          | <i>0.05</i> | 1.00                                                       | 0.36                          | <i>0.17</i> | 1.00                                                               | 0.78                          | <i>0.83</i> | 0.00                                       | 0.36                          | <i>0.16</i> |
| T2                        | 0.89 (0.63, 1.24)                                  |                               |             | 0.86 (0.52, 1.43)                                          |                               |             | 0.91 (0.69, 1.19)                                                  |                               |             | -0.75 (-4.65, 3.14)                        |                               |             |
| T3                        | 0.69 (0.48, 0.99)                                  |                               |             | 0.67 (0.38, 1.16)                                          |                               |             | 0.93 (0.71, 1.24)                                                  |                               |             | -2.73 (-6.61, 1.15)                        |                               |             |
| <b>Triclosan</b>          |                                                    |                               |             |                                                            |                               |             |                                                                    |                               |             |                                            |                               |             |
| Continuous <sup>d</sup>   | 0.99 (0.93, 1.04)                                  |                               | 0.62        | 0.99 (0.91, 1.08)                                          |                               | 0.89        | 0.99 (0.95, 1.04)                                                  |                               | 0.70        | 0.07 (-0.57, 0.71)                         |                               | 0.83        |
| T1                        | 1.00                                               | 0.97                          | <i>0.80</i> | 1.00                                                       | 1.00                          | <i>0.93</i> | 1.00                                                               | 0.94                          | <i>0.73</i> | 0.00                                       | 0.99                          | <i>0.94</i> |
| T2                        | 0.98 (0.70, 1.39)                                  |                               |             | 1.00 (0.59, 1.70)                                          |                               |             | 0.99 (0.75, 1.30)                                                  |                               |             | -0.16 (-4.11, 3.79)                        |                               |             |
| T3                        | 0.96 (0.68, 1.35)                                  |                               |             | 0.98 (0.58, 1.67)                                          |                               |             | 0.95 (0.73, 1.25)                                                  |                               |             | 0.18 (-4.07, 3.70)                         |                               |             |
| <b>Methyl-paraben</b>     |                                                    |                               |             |                                                            |                               |             |                                                                    |                               |             |                                            |                               |             |
| Continuous <sup>d</sup>   | 0.93 (0.85, 1.02)                                  |                               | 0.11        | 1.02 (0.89, 1.17)                                          |                               | 0.75        | 0.94 (0.87, 1.01)                                                  |                               | 0.10        | -0.46 (-1.40, 0.49)                        |                               | 0.34        |
| T1                        | 1.00                                               | 0.09                          | <i>0.16</i> | 1.00                                                       | 0.87                          | <i>0.94</i> | 1.00                                                               | 0.03                          | <i>0.01</i> | 0.00                                       | 0.18                          | <i>0.31</i> |
| T2                        | 0.71 (0.50, 1.00)                                  |                               |             | 1.14 (0.68, 1.91)                                          |                               |             | 0.81 (0.62, 1.06)                                                  |                               |             | 2.44 (-1.47, 6.35)                         |                               |             |
| T3                        | 0.73 (0.52, 1.03)                                  |                               |             | 1.01 (0.58, 1.75)                                          |                               |             | 0.68 (0.52, 0.90)                                                  |                               |             | -1.21 (-5.02, 2.59)                        |                               |             |
| <b>Ethyl-paraben</b>      |                                                    |                               |             |                                                            |                               |             |                                                                    |                               |             |                                            |                               |             |
| Continuous <sup>d</sup>   | 1.02 (0.95, 1.09)                                  |                               | 0.58        | 1.11 (0.99, 1.23)                                          |                               | 0.08        | 0.99 (0.94, 1.04)                                                  |                               | 0.69        | -0.85 (-1.57, -0.13)                       |                               | 0.02        |
| T1                        | 1.00                                               | 0.49                          | <i>0.82</i> | 1.00                                                       | 0.08                          | <i>0.17</i> | 1.00                                                               | 0.001                         | <i>0.08</i> | 0.00                                       | 0.10                          | <i>0.04</i> |
| T2                        | 1.23 (0.87, 1.75)                                  |                               |             | 1.80 (1.03, 3.16)                                          |                               |             | 1.51 (1.15, 1.98)                                                  |                               |             | -1.98 (-5.79, 1.83)                        |                               |             |
| T3                        | 1.13 (0.79, 1.61)                                  |                               |             | 1.82 (1.02, 3.25)                                          |                               |             | 0.95 (0.71, 1.26)                                                  |                               |             | -4.28 (-8.15, -0.41)                       |                               |             |
| <b>Propyl-paraben</b>     |                                                    |                               |             |                                                            |                               |             |                                                                    |                               |             |                                            |                               |             |
| Continuous <sup>d</sup>   | 0.94 (0.88, 1.02)                                  |                               | 0.12        | 1.00 (0.90, 1.12)                                          |                               | 0.95        | 0.96 (0.91, 1.02)                                                  |                               | 0.19        | -0.19 (-0.98, 0.60)                        |                               | 0.63        |
| T1                        | 1.00                                               | 0.62                          | <i>0.45</i> | 1.00                                                       | 0.91                          | <i>0.75</i> | 1.00                                                               | 0.27                          | <i>0.22</i> | 0.00                                       | 0.46                          | <i>0.46</i> |
| T2                        | 0.88 (0.63, 1.24)                                  |                               |             | 0.92 (0.55, 1.61)                                          |                               |             | 0.84 (0.64, 1.11)                                                  |                               |             | 1.80 (-2.06, 5.66)                         |                               |             |
| T3                        | 0.85 (0.60, 1.20)                                  |                               |             | 1.06 (0.62, 1.81)                                          |                               |             | 0.81 (0.61, 1.06)                                                  |                               |             | -0.62 (-4.52, 3.28)                        |                               |             |
| <b>Butyl-paraben</b>      |                                                    |                               |             |                                                            |                               |             |                                                                    |                               |             |                                            |                               |             |
| Continuous <sup>d</sup>   | 0.99 (0.92, 1.06)                                  |                               | 0.77        | 0.99 (0.88, 1.11)                                          |                               | 0.87        | 0.98 (0.93, 1.03)                                                  |                               | 0.45        | -0.91 (-1.68, -0.14)                       |                               | 0.02        |
| T1                        | 1.00                                               | 0.46                          | <i>0.31</i> | 1.00                                                       | 0.98                          | <i>0.84</i> | 1.00                                                               | 0.004                         | <i>0.01</i> | 0.00                                       | 0.15                          | <i>0.06</i> |
| T2                        | 1.11 (0.79, 1.57)                                  |                               |             | 1.00 (0.59, 1.70)                                          |                               |             | 1.26 (0.96, 1.66)                                                  |                               |             | -1.30 (-5.12, 2.52)                        |                               |             |
| T3                        | 0.89 (0.62, 1.29)                                  |                               |             | 1.05 (0.60, 1.85)                                          |                               |             | 0.79 (0.59, 1.06)                                                  |                               |             | -3.78 (-7.63, 0.07)                        |                               |             |
| <b>∑Parabens</b>          |                                                    |                               |             |                                                            |                               |             |                                                                    |                               |             |                                            |                               |             |
| Continuous <sup>d</sup>   | 0.93 (0.85, 1.01)                                  |                               | 0.09        | 1.02 (0.89, 1.17)                                          |                               | 0.79        | 0.95 (0.88, 1.02)                                                  |                               | 0.13        | -0.48 (-1.43, 0.47)                        |                               | 0.32        |
| T1                        | 1.00                                               | 0.13                          | <i>0.14</i> | 1.00                                                       | 0.89                          | <i>0.73</i> | 1.00                                                               | 0.07                          | <i>0.06</i> | 0.00                                       | 0.43                          | <i>0.67</i> |
| T2                        | 0.75 (0.54, 1.06)                                  |                               |             | 1.06 (0.64, 1.78)                                          |                               |             | 0.78 (0.60, 1.02)                                                  |                               |             | 2.07 (-1.88, 6.01)                         |                               |             |
| T3                        | 0.73 (0.52, 1.04)                                  |                               |             | 0.93 (0.54, 1.61)                                          |                               |             | 0.74 (0.56, 0.98)                                                  |                               |             | -0.38 (-4.19, 3.44)                        |                               |             |

HR = hazard ratio; FEV<sub>1</sub>% = forced expiratory volume in 1 second expressed in percent predicted; CI = confidence interval; ∑Dichlorophenols = molar sum of 2-Dichlorophenols (2,4-, 2,5-dichlorophenols); ∑Parabens = molar sum of parabens (Methyl-, Ethyl-, Propyl-, Butyl-parabens).

<sup>a</sup> Models adjusted for centre, residence area, parental history of allergies, maternal ethnicity, maximal parental education level, maternal or passive smoking during pregnancy, postnatal passive smoking, older siblings, day-care. Missing values in covariates were imputed using the MICE multiple imputation method (100 imputations were performed) <sup>b</sup> additionally adjusted for child's height and age.

<sup>c</sup> Standardized for urine sampling conditions (creatinine level, day and hour of sampling, gestational age, storage duration at room temperature and year of analysis), as detailed in Mortamais et al. (2012).

<sup>d</sup> Estimates for 1 unit increase in ln-transformed standardized concentration.

<sup>e</sup> p-values of heterogeneity test.

Italicized p-values are p-values of monotonic trend test.

**Table S9.** Adjusted associations between pregnancy phthalate metabolites standardized concentrations and respiratory outcomes (n=470) and FEV<sub>1</sub>% (n=185) in boys from non-asthmatic parents.

| Phthalate <sup>c</sup>  | Wheezing (until age 5y) <sup>a</sup> |                               |         | Asthma diagnosis (until age 5y) <sup>a</sup> |                               |         | Bronchiolitis/Bronchitis (until age 3y) <sup>a</sup> |                               |         | FEV <sub>1</sub> % <sup>b</sup> |                               |         |
|-------------------------|--------------------------------------|-------------------------------|---------|----------------------------------------------|-------------------------------|---------|------------------------------------------------------|-------------------------------|---------|---------------------------------|-------------------------------|---------|
|                         | HR (95% CI)                          | p <sub>het</sub> <sup>e</sup> | p-value | HR (95% CI)                                  | p <sub>het</sub> <sup>e</sup> | p-value | HR (95% CI)                                          | p <sub>het</sub> <sup>e</sup> | p-value | beta (95% CI)                   | p <sub>het</sub> <sup>e</sup> | p-value |
|                         | N = 470                              |                               |         | N = 470                                      |                               |         | N = 470                                              |                               |         | N = 185                         |                               |         |
| <b>ΣLMW</b>             |                                      |                               |         |                                              |                               |         |                                                      |                               |         |                                 |                               |         |
| Continuous <sup>d</sup> | 0.90 (0.76, 1.07)                    |                               | 0.25    | 0.92 (0.71, 1.20)                            |                               | 0.55    | 0.97 (0.85, 1.11)                                    |                               | 0.71    | -1.29 (-3.26, 0.68)             |                               | 0.20    |
| T1                      | 1.00                                 | 0.42                          | 0.26    | 1.00                                         | 0.88                          | 0.67    | 1.00                                                 | 0.84                          | 0.61    | 0.00                            | 0.10                          | 0.03    |
| T2                      | 0.85 (0.60, 1.19)                    |                               |         | 1.04 (0.62, 1.74)                            |                               |         | 0.94 (0.72, 1.24)                                    |                               |         | -0.32 (-4.18, 3.54)             |                               |         |
| T3                      | 0.80 (0.56, 1.13)                    |                               |         | 0.90 (0.52, 1.56)                            |                               |         | 0.92 (0.70, 1.22)                                    |                               |         | -3.71 (-7.50, -0.07)            |                               |         |
| <b>MEP</b>              |                                      |                               |         |                                              |                               |         |                                                      |                               |         |                                 |                               |         |
| Continuous <sup>d</sup> | 0.95 (0.83, 1.08)                    |                               | 0.43    | 1.01 (0.82, 1.24)                            |                               | 0.94    | 0.99 (0.90, 1.10)                                    |                               | 0.91    | -1.19 (-2.75, 0.36)             |                               | 0.13    |
| T1                      | 1.00                                 | 0.65                          | 0.35    | 1.00                                         | 0.80                          | 0.51    | 1.00                                                 | 0.69                          | 0.66    | 0.00                            | 0.43                          | 0.26    |
| T2                      | 0.95 (0.67, 1.34)                    |                               |         | 0.92 (0.54, 1.57)                            |                               |         | 1.09 (0.83, 1.43)                                    |                               |         | -2.01 (-5.87, 1.86)             |                               |         |
| T3                      | 0.85 (0.60, 1.21)                    |                               |         | 0.83 (0.48, 1.43)                            |                               |         | 0.97 (0.73, 1.28)                                    |                               |         | -2.36 (-6.24, 1.51)             |                               |         |
| <b>MnBP</b>             |                                      |                               |         |                                              |                               |         |                                                      |                               |         |                                 |                               |         |
| Continuous <sup>d</sup> | 1.00 (0.88, 1.14)                    |                               | 0.97    | 0.97 (0.78, 1.19)                            |                               | 0.74    | 0.95 (0.85, 1.06)                                    |                               | 0.31    | -0.18 (-1.65, 1.30)             |                               | 0.81    |
| T1                      | 1.00                                 | 0.97                          | 0.85    | 1.00                                         | 0.74                          | 0.56    | 1.00                                                 | 0.10                          | 0.34    | 0.00                            | 0.42                          | 0.51    |
| T2                      | 1.04 (0.74, 1.47)                    |                               |         | 0.85 (0.50, 1.42)                            |                               |         | 0.75 (0.57, 0.98)                                    |                               |         | 1.76 (-2.20, 5.72)              |                               |         |
| T3                      | 1.04 (0.73, 1.49)                    |                               |         | 0.83 (0.48, 1.42)                            |                               |         | 0.80 (0.61, 1.06)                                    |                               |         | -0.72 (-4.75, 3.32)             |                               |         |
| <b>MiBP</b>             |                                      |                               |         |                                              |                               |         |                                                      |                               |         |                                 |                               |         |
| Continuous <sup>d</sup> | 1.01 (0.85, 1.20)                    |                               | 0.88    | 1.15 (0.87, 1.51)                            |                               | 0.33    | 1.08 (0.94, 1.24)                                    |                               | 0.29    | -0.77 (-2.68, 1.14)             |                               | 0.43    |
| T1                      | 1.00                                 | 0.81                          | 0.83    | 1.00                                         | 0.98                          | 0.97    | 1.00                                                 | 0.86                          | 0.59    | 0.00                            | 0.38                          | 0.23    |
| T2                      | 0.91 (0.63, 1.30)                    |                               |         | 1.06 (0.62, 1.80)                            |                               |         | 1.03 (0.78, 1.37)                                    |                               |         | 0.80 (-3.11, 4.71)              |                               |         |
| T3                      | 1.01 (0.71, 1.43)                    |                               |         | 1.02 (0.60, 1.75)                            |                               |         | 1.08 (0.82, 1.43)                                    |                               |         | -1.88 (-5.76, 2.01)             |                               |         |
| <b>ΣHMW</b>             |                                      |                               |         |                                              |                               |         |                                                      |                               |         |                                 |                               |         |
| Continuous <sup>d</sup> | 1.12 (0.93, 1.34)                    |                               | 0.23    | 1.15 (0.86, 1.53)                            |                               | 0.35    | 0.95 (0.82, 1.10)                                    |                               | 0.49    | -1.31 (-3.47, 0.84)             |                               | 0.23    |
| T1                      | 1.00                                 | 0.39                          | 0.89    | 1.00                                         | 0.93                          | 0.81    | 1.00                                                 | 0.55                          | 0.37    | 0.00                            | 0.23                          | 0.76    |
| T2                      | 1.24 (0.88, 1.76)                    |                               |         | 1.06 (0.62, 1.80)                            |                               |         | 0.88 (0.67, 1.16)                                    |                               |         | -3.33 (-7.18, 0.52)             |                               |         |
| T3                      | 1.03 (0.72, 1.47)                    |                               |         | 0.95 (0.56, 1.64)                            |                               |         | 0.87 (0.66, 1.14)                                    |                               |         | -1.46 (-5.36, 2.44)             |                               |         |
| <b>MCPP</b>             |                                      |                               |         |                                              |                               |         |                                                      |                               |         |                                 |                               |         |
| Continuous <sup>d</sup> | 0.99 (0.84, 1.17)                    |                               | 0.90    | 0.97 (0.75, 1.27)                            |                               | 0.85    | 0.87 (0.76, 1.00)                                    |                               | 0.04    | -0.28 (-2.28, 1.72)             |                               | 0.78    |
| T1                      | 1.00                                 | 0.56                          | 0.80    | 1.00                                         | 0.98                          | 0.86    | 1.00                                                 | 0.15                          | 0.08    | 0.00                            | 0.23                          | 0.50    |
| T2                      | 1.18 (0.83, 1.65)                    |                               |         | 0.98 (0.57, 1.66)                            |                               |         | 1.05 (0.81, 1.38)                                    |                               |         | -2.66 (-6.47, 1.15)             |                               |         |
| T3                      | 1.00 (0.70, 1.43)                    |                               |         | 0.95 (0.56, 1.63)                            |                               |         | 0.81 (0.61, 1.07)                                    |                               |         | 0.38 (-3.51, 4.27)              |                               |         |
| <b>MBzP</b>             |                                      |                               |         |                                              |                               |         |                                                      |                               |         |                                 |                               |         |
| Continuous <sup>d</sup> | 1.01 (0.87, 1.16)                    |                               | 0.95    | 1.16 (0.92, 1.45)                            |                               | 0.20    | 1.00 (0.89, 1.12)                                    |                               | 0.98    | -0.82 (-2.60, 0.95)             |                               | 0.36    |
| T1                      | 1.00                                 | 0.75                          | 0.53    | 1.00                                         | 0.62                          | 0.95    | 1.00                                                 | 0.97                          | 0.96    | 0.00                            | 0.13                          | 0.05    |
| T2                      | 1.04 (0.74, 1.48)                    |                               |         | 1.29 (0.75, 2.23)                            |                               |         | 0.97 (0.74, 1.28)                                    |                               |         | -2.00 (-5.91, 1.92)             |                               |         |
| T3                      | 0.92 (0.64, 1.31)                    |                               |         | 1.08 (0.61, 1.89)                            |                               |         | 1.00 (0.76, 1.31)                                    |                               |         | -3.92 (-7.77, -0.08)            |                               |         |
| <b>MCNP</b>             |                                      |                               |         |                                              |                               |         |                                                      |                               |         |                                 |                               |         |
| Continuous <sup>d</sup> | 1.12 (0.98, 1.28)                    |                               | 0.09    | 1.12 (0.92, 1.36)                            |                               | 0.27    | 0.98 (0.88, 1.09)                                    |                               | 0.69    | -0.06 (-1.74, 1.62)             |                               | 0.94    |
| T1                      | 1.00                                 | 0.31                          | 0.15    | 1.00                                         | 0.60                          | 0.46    | 1.00                                                 | 0.96                          | 0.98    | 0.00                            | 0.51                          | 0.61    |
| T2                      | 1.16 (0.81, 1.65)                    |                               |         | 1.27 (0.73, 2.20)                            |                               |         | 1.04 (0.79, 1.37)                                    |                               |         | -2.14 (-6.02, 1.73)             |                               |         |
| T3                      | 1.31 (0.93, 1.85)                    |                               |         | 1.29 (0.75, 2.21)                            |                               |         | 1.02 (0.77, 1.33)                                    |                               |         | -1.82 (-5.79, 2.15)             |                               |         |
| <b>MCOP</b>             |                                      |                               |         |                                              |                               |         |                                                      |                               |         |                                 |                               |         |
| Continuous <sup>d</sup> | 1.07 (0.91, 1.27)                    |                               | 0.40    | 1.09 (0.85, 1.38)                            |                               | 0.50    | 1.15 (1.02, 1.31)                                    |                               | 0.03    | -1.78 (-3.50, -0.06)            |                               | 0.04    |
| T1                      | 1.00                                 | 0.68                          | 0.69    | 1.00                                         | 0.81                          | 0.66    | 1.00                                                 | 0.63                          | 0.66    | 0.00                            | 0.11                          | 0.04    |
| T2                      | 1.12 (0.79, 1.58)                    |                               |         | 0.91 (0.53, 1.57)                            |                               |         | 1.14 (0.87, 1.50)                                    |                               |         | -0.87 (-4.74, 3.00)             |                               |         |
| T3                      | 0.96 (0.68, 1.37)                    |                               |         | 1.09 (0.65, 1.85)                            |                               |         | 1.09 (0.83, 1.44)                                    |                               |         | -3.91 (-7.77, -0.05)            |                               |         |
| <b>MEHHP</b>            |                                      |                               |         |                                              |                               |         |                                                      |                               |         |                                 |                               |         |
| Continuous <sup>d</sup> | 1.14 (0.96, 1.36)                    |                               | 0.13    | 1.10 (0.85, 1.42)                            |                               | 0.48    | 1.00 (0.88, 1.14)                                    |                               | 0.98    | -0.86 (-2.70, 0.97)             |                               | 0.35    |
| T1                      | 1.00                                 | 0.21                          | 0.58    | 1.00                                         | 0.37                          | 0.76    | 1.00                                                 | 0.62                          | 0.82    | 0.00                            | 0.22                          | 0.75    |
| T2                      | 1.37 (0.97, 1.95)                    |                               |         | 1.38 (0.81, 2.35)                            |                               |         | 1.12 (0.85, 1.47)                                    |                               |         | -3.20 (-6.98, 0.58)             |                               |         |
| T3                      | 1.18 (0.82, 1.69)                    |                               |         | 1.00 (0.57, 1.74)                            |                               |         | 0.99 (0.75, 1.31)                                    |                               |         | -0.79 (-4.73, 3.15)             |                               |         |
| <b>MEOHP</b>            |                                      |                               |         |                                              |                               |         |                                                      |                               |         |                                 |                               |         |
| Continuous <sup>d</sup> | 1.13 (0.95, 1.33)                    |                               | 0.16    | 1.08 (0.83, 1.41)                            |                               | 0.56    | 0.97 (0.85, 1.11)                                    |                               | 0.68    | -1.25 (-3.13, 0.63)             |                               | 0.19    |
| T1                      | 1.00                                 | 0.09                          | 0.66    | 1.00                                         | 0.72                          | 0.54    | 1.00                                                 | 0.25                          | 0.62    | 0.00                            | 0.10                          | 0.51    |
| T2                      | 1.46 (1.03, 2.07)                    |                               |         | 1.07 (0.64, 1.81)                            |                               |         | 1.19 (0.91, 1.57)                                    |                               |         | -4.19 (-8.02, -0.35)            |                               |         |
| T3                      | 1.15 (0.80, 1.66)                    |                               |         | 0.86 (0.50, 1.49)                            |                               |         | 0.96 (0.73, 1.28)                                    |                               |         | -1.74 (-5.62, 2.13)             |                               |         |
| <b>MECPP</b>            |                                      |                               |         |                                              |                               |         |                                                      |                               |         |                                 |                               |         |
| Continuous <sup>d</sup> | 1.13 (0.95, 1.34)                    |                               | 0.17    | 1.13 (0.87, 1.49)                            |                               | 0.36    | 0.95 (0.82, 1.10)                                    |                               | 0.48    | -1.21 (-3.22, 0.80)             |                               | 0.24    |
| T1                      | 1.00                                 | 0.11                          | 0.47    | 1.00                                         | 0.78                          | 0.92    | 1.00                                                 | 0.91                          | 0.66    | 0.00                            | 0.28                          | 0.52    |
| T2                      | 1.45 (1.02, 2.06)                    |                               |         | 1.21 (0.70, 2.07)                            |                               |         | 0.98 (0.75, 1.29)                                    |                               |         | -3.18 (-7.10, 0.74)             |                               |         |
| T3                      | 1.23 (0.86, 1.76)                    |                               |         | 1.07 (0.62, 1.85)                            |                               |         | 0.94 (0.72, 1.24)                                    |                               |         | -1.91 (-5.81, 2.00)             |                               |         |
| <b>MEHP</b>             |                                      |                               |         |                                              |                               |         |                                                      |                               |         |                                 |                               |         |
| Continuous <sup>d</sup> | 1.04 (0.91, 1.20)                    |                               | 0.55    | 1.06 (0.86, 1.32)                            |                               | 0.57    | 0.93 (0.83, 1.04)                                    |                               | 0.21    | -0.81 (-2.32, 0.70)             |                               | 0.29    |
| T1                      | 1.00                                 | 0.39                          | 0.19    | 1.00                                         | 0.31                          | 0.77    | 1.00                                                 | 0.25                          | 0.75    | 0.00                            | 0.69                          | 0.39    |
| T2                      | 1.00 (0.70, 1.43)                    |                               |         | 0.93 (0.53, 1.64)                            |                               |         | 0.81 (0.62, 1.07)                                    |                               |         | -0.34 (-4.21, 3.53)             |                               |         |
| T3                      | 1.23 (0.87, 1.73)                    |                               |         | 1.36 (0.81, 2.81)                            |                               |         | 0.99 (0.76, 1.30)                                    |                               |         | -1.61 (-5.51, 2.29)             |                               |         |
| <b>ΣDEHP</b>            |                                      |                               |         |                                              |                               |         |                                                      |                               |         |                                 |                               |         |
| Continuous <sup>d</sup> | 1.13 (0.95, 1.34)                    |                               | 0.18    | 1.10 (0.84, 1.45)                            |                               | 0.48    | 0.96 (0.83, 1.11)                                    |                               | 0.57    | -1.14 (-3.10, 0.82)             |                               | 0.25    |
| T1                      | 1.00                                 | 0.10                          | 0.78    | 1.00                                         | 0.66                          | 0.62    | 1.00                                                 | 0.69                          | 0.80    | 0.00                            | 0.16                          | 0.70    |
| T2                      | 1.45 (1.02, 2.07)                    |                               |         | 1.16 (0.68, 1.98)                            |                               |         | 1.10 (0.84, 1.45)                                    |                               |         | -3.37 (-7.23, 0.48)             |                               |         |
| T3                      | 1.14 (0.79, 1.63)                    |                               |         | 0.91 (0.53, 1.57)                            |                               |         | 0.99 (0.75, 1.30)                                    |                               |         | -0.30 (-4.21, 3.60)             |                               |         |

HR = hazard ratio; FEV<sub>1</sub>% = forced expiratory volume in 1 second expressed in percent predicted; CI = confidence interval; ΣLMW = molar sum of Low Molecular Weight phthalates (MEP, MnBP, MiBP); ΣHMW = molar sum of High Molecular Weight phthalates (MCPP, MBzP, MCNP, MCOP, MEHHP, MEOHP, MECPP, MEHP); ΣDEHP = molar sum of di(2-ethylhexyl) phthalate metabolites (MEHHP, MEOHP, MECPP, MEHP). Parent compounds and associated metabolites are detailed in Table S1 (Supplemental material)

<sup>a</sup> Models adjusted for centre, residence area, parental history of allergies, maternal ethnicity, maximal parental education level, maternal or passive smoking during pregnancy, postnatal passive smoking, older siblings, day-care. Missing values in covariates were imputed using the MICE multiple imputation method (100 imputations were performed) <sup>b</sup> additionally adjusted for child's height and age.

<sup>c</sup> Standardized for urine sampling conditions (creatinine level, day and hour of sampling, gestational age, storage duration at room temperature and year of analysis), as detailed in Mortamais et al. (2012).

<sup>d</sup> Estimates for 1 unit increase in ln-transformed standardized concentration.

<sup>e</sup> p-values of heterogeneity test.

Italicized p-values are p-values of monotonic trend test.

**Table S10.** Adjusted associations between pregnancy phenols standardized concentrations and respiratory outcomes (n=562) and FEV<sub>1</sub>% (n=217) in full-term boys.

| Phenol <sup>c</sup>       | Wheezing<br>(until age 5y) <sup>a</sup><br>N = 562 |                               |         | Asthma diagnosis<br>(until age 5y) <sup>a</sup><br>N = 562 |                               |         | Bronchiolitis/Bronchitis<br>(until age 3y) <sup>a</sup><br>N = 562 |                               |         | FEV <sub>1</sub> % <sup>b</sup><br>N = 217 |                               |         |
|---------------------------|----------------------------------------------------|-------------------------------|---------|------------------------------------------------------------|-------------------------------|---------|--------------------------------------------------------------------|-------------------------------|---------|--------------------------------------------|-------------------------------|---------|
|                           | HR (95% CI)                                        | p <sub>het</sub> <sup>e</sup> | p-value | HR (95% CI)                                                | p <sub>het</sub> <sup>e</sup> | p-value | HR (95% CI)                                                        | p <sub>het</sub> <sup>e</sup> | p-value | beta (95% CI)                              | p <sub>het</sub> <sup>e</sup> | p-value |
| <b>2,4-Dichlorophenol</b> |                                                    |                               |         |                                                            |                               |         |                                                                    |                               |         |                                            |                               |         |
| Continuous <sup>d</sup>   | 1.04 (0.93, 1.17)                                  |                               | 0.45    | 1.07 (0.90, 1.27)                                          |                               | 0.45    | 0.98 (0.89, 1.08)                                                  |                               | 0.63    | 0.62 (-0.69, 1.93)                         |                               | 0.35    |
| T1                        | 1.00                                               | 0.38                          | 0.97    | 1.00                                                       | 0.28                          | 0.91    | 1.00                                                               | 0.39                          | 0.42    | 0.00                                       | 0.62                          | 0.95    |
| T2                        | 1.24 (0.90, 1.70)                                  |                               |         | 1.45 (0.91, 2.31)                                          |                               |         | 1.12 (0.87, 1.44)                                                  |                               |         | 1.83 (-1.91, 5.57)                         |                               |         |
| T3                        | 1.06 (0.77, 1.46)                                  |                               |         | 1.14 (0.70, 1.86)                                          |                               |         | 0.94 (0.73, 1.21)                                                  |                               |         | 0.67 (-2.93, 4.26)                         |                               |         |
| <b>2,5-Dichlorophenol</b> |                                                    |                               |         |                                                            |                               |         |                                                                    |                               |         |                                            |                               |         |
| Continuous <sup>d</sup>   | 1.07 (0.99, 1.16)                                  |                               | 0.08    | 1.07 (0.95, 1.20)                                          |                               | 0.25    | 1.00 (0.94, 1.07)                                                  |                               | 1.00    | 0.27 (-0.62, 1.16)                         |                               | 0.55    |
| T1                        | 1.00                                               | 0.01                          | 0.19    | 1.00                                                       | 0.20                          | 0.20    | 1.00                                                               | 0.65                          | 0.57    | 0.00                                       | 0.93                          | 0.80    |
| T2                        | 1.68 (1.21, 2.33)                                  |                               |         | 1.45 (0.89, 2.35)                                          |                               |         | 0.92 (0.71, 1.19)                                                  |                               |         | -0.44 (-4.13, 3.24)                        |                               |         |
| T3                        | 1.49 (1.07, 2.07)                                  |                               |         | 1.50 (0.93, 2.43)                                          |                               |         | 1.03 (0.80, 1.33)                                                  |                               |         | 0.25 (-3.36, 3.86)                         |                               |         |
| <b>∑Dichlorophenols</b>   |                                                    |                               |         |                                                            |                               |         |                                                                    |                               |         |                                            |                               |         |
| Continuous <sup>d</sup>   | 1.07 (0.99, 1.16)                                  |                               | 0.10    | 1.07 (0.95, 1.21)                                          |                               | 0.27    | 1.00 (0.93, 1.07)                                                  |                               | 0.97    | 0.32 (-0.62, 1.26)                         |                               | 0.50    |
| T1                        | 1.00                                               | 0.06                          | 0.18    | 1.00                                                       | 0.21                          | 0.19    | 1.00                                                               | 0.71                          | 0.42    | 0.00                                       | 0.87                          | 0.89    |
| T2                        | 1.44 (1.04, 1.99)                                  |                               |         | 1.42 (0.87, 2.30)                                          |                               |         | 1.00 (0.77, 1.29)                                                  |                               |         | -0.89 (-4.61, 2.82)                        |                               |         |
| T3                        | 1.40 (1.01, 1.93)                                  |                               |         | 1.51 (0.93, 2.44)                                          |                               |         | 1.10 (0.85, 1.41)                                                  |                               |         | -0.08 (-3.68, 3.53)                        |                               |         |
| <b>Bisphenol A</b>        |                                                    |                               |         |                                                            |                               |         |                                                                    |                               |         |                                            |                               |         |
| Continuous <sup>d</sup>   | 0.98 (0.83, 1.16)                                  |                               | 0.83    | 1.19 (0.94, 1.51)                                          |                               | 0.15    | 1.14 (0.99, 1.31)                                                  |                               | 0.06    | -0.66 (-2.53, 1.20)                        |                               | 0.48    |
| T1                        | 1.00                                               | 1.00                          | 0.98    | 1.00                                                       | 0.45                          | 0.21    | 1.00                                                               | 0.39                          | 0.18    | 0.00                                       | 0.59                          | 0.63    |
| T2                        | 1.01 (0.74, 1.38)                                  |                               |         | 1.07 (0.65, 1.76)                                          |                               |         | 1.10 (0.86, 1.42)                                                  |                               |         | -1.85 (-5.45, 1.76)                        |                               |         |
| T3                        | 1.01 (0.73, 1.39)                                  |                               |         | 1.32 (0.83, 2.12)                                          |                               |         | 1.20 (0.93, 1.54)                                                  |                               |         | -1.28 (-4.98, 2.42)                        |                               |         |
| <b>Benzophenone-3</b>     |                                                    |                               |         |                                                            |                               |         |                                                                    |                               |         |                                            |                               |         |
| Continuous <sup>d</sup>   | 0.92 (0.85, 1.00)                                  |                               | 0.06    | 0.94 (0.83, 1.06)                                          |                               | 0.30    | 1.00 (0.93, 1.06)                                                  |                               | 0.90    | -0.32 (-1.29, 0.65)                        |                               | 0.69    |
| T1                        | 1.00                                               | 0.03                          | 0.01    | 1.00                                                       | 0.11                          | 0.07    | 1.00                                                               | 0.72                          | 0.79    | 0.00                                       | 0.89                          | 0.75    |
| T2                        | 0.88 (0.65, 1.20)                                  |                               |         | 0.76 (0.49, 1.20)                                          |                               |         | 0.90 (0.70, 1.16)                                                  |                               |         | -0.71 (-4.33, 2.91)                        |                               |         |
| T3                        | 0.65 (0.47, 0.90)                                  |                               |         | 0.59 (0.36, 0.97)                                          |                               |         | 0.93 (0.72, 1.20)                                                  |                               |         | -0.78 (-4.34, 2.78)                        |                               |         |
| <b>Triclosan</b>          |                                                    |                               |         |                                                            |                               |         |                                                                    |                               |         |                                            |                               |         |
| Continuous <sup>d</sup>   | 0.98 (0.94, 1.04)                                  |                               | 0.62    | 0.98 (0.91, 1.06)                                          |                               | 0.63    | 1.00 (0.96, 1.04)                                                  |                               | 0.94    | 0.10 (-0.48, 0.69)                         |                               | 0.73    |
| T1                        | 1.00                                               | 0.88                          | 0.63    | 1.00                                                       | 0.88                          | 0.75    | 1.00                                                               | 0.98                          | 0.95    | 0.00                                       | 0.91                          | 0.82    |
| T2                        | 0.97 (0.71, 1.32)                                  |                               |         | 1.09 (0.69, 1.72)                                          |                               |         | 1.02 (0.80, 1.31)                                                  |                               |         | 0.52 (-3.04, 4.08)                         |                               |         |
| T3                        | 0.92 (0.68, 1.26)                                  |                               |         | 0.97 (0.60, 1.55)                                          |                               |         | 1.00 (0.78, 1.29)                                                  |                               |         | -0.25 (-3.88, 3.38)                        |                               |         |
| <b>Methyl-paraben</b>     |                                                    |                               |         |                                                            |                               |         |                                                                    |                               |         |                                            |                               |         |
| Continuous <sup>d</sup>   | 0.93 (0.85, 1.01)                                  |                               | 0.07    | 1.01 (0.89, 1.14)                                          |                               | 0.93    | 0.95 (0.89, 1.02)                                                  |                               | 0.14    | -0.42 (-1.29, 0.44)                        |                               | 0.33    |
| T1                        | 1.00                                               | 0.08                          | 0.14    | 1.00                                                       | 0.96                          | 0.99    | 1.00                                                               | 0.06                          | 0.03    | 0.00                                       | 0.26                          | 0.22    |
| T2                        | 0.74 (0.54, 1.00)                                  |                               |         | 0.94 (0.59, 1.49)                                          |                               |         | 0.85 (0.66, 1.08)                                                  |                               |         | 1.57 (-2.08, 5.22)                         |                               |         |
| T3                        | 0.74 (0.54, 1.01)                                  |                               |         | 0.99 (0.61, 1.59)                                          |                               |         | 0.73 (0.57, 0.95)                                                  |                               |         | -1.51 (-5.03, 2.01)                        |                               |         |
| <b>Ethyl-paraben</b>      |                                                    |                               |         |                                                            |                               |         |                                                                    |                               |         |                                            |                               |         |
| Continuous <sup>d</sup>   | 1.01 (0.95, 1.07)                                  |                               | 0.86    | 1.10 (1.00, 1.22)                                          |                               | 0.04    | 0.99 (0.95, 1.04)                                                  |                               | 0.80    | -0.52 (-1.19, 0.15)                        |                               | 0.13    |
| T1                        | 1.00                                               | 0.65                          | 0.83    | 1.00                                                       | 0.05                          | 0.10    | 1.00                                                               | 0.01                          | 0.29    | 0.00                                       | 0.53                          | 0.31    |
| T2                        | 1.16 (0.85, 1.59)                                  |                               |         | 1.67 (1.02, 2.74)                                          |                               |         | 1.38 (1.07, 1.78)                                                  |                               |         | -1.05 (-4.65, 2.55)                        |                               |         |
| T3                        | 1.10 (0.79, 1.51)                                  |                               |         | 1.79 (1.08, 2.98)                                          |                               |         | 1.01 (0.78, 1.31)                                                  |                               |         | -2.05 (-5.64, 1.54)                        |                               |         |
| <b>Propyl-paraben</b>     |                                                    |                               |         |                                                            |                               |         |                                                                    |                               |         |                                            |                               |         |
| Continuous <sup>d</sup>   | 0.95 (0.89, 1.02)                                  |                               | 0.18    | 0.99 (0.89, 1.09)                                          |                               | 0.79    | 0.97 (0.92, 1.03)                                                  |                               | 0.29    | -0.18 (-0.91, 0.56)                        |                               | 0.63    |
| T1                        | 1.00                                               | 0.24                          | 0.31    | 1.00                                                       | 0.72                          | 0.72    | 1.00                                                               | 0.37                          | 0.22    | 0.00                                       | 0.83                          | 0.55    |
| T2                        | 0.79 (0.58, 1.08)                                  |                               |         | 0.83 (0.52, 1.32)                                          |                               |         | 0.90 (0.70, 1.15)                                                  |                               |         | 0.05 (-3.56, 3.66)                         |                               |         |
| T3                        | 0.80 (0.58, 1.09)                                  |                               |         | 0.87 (0.54, 1.40)                                          |                               |         | 0.84 (0.65, 1.08)                                                  |                               |         | -0.95 (-4.53, 2.63)                        |                               |         |
| <b>Butyl-paraben</b>      |                                                    |                               |         |                                                            |                               |         |                                                                    |                               |         |                                            |                               |         |
| Continuous <sup>d</sup>   | 0.98 (0.92, 1.05)                                  |                               | 0.60    | 1.00 (0.90, 1.10)                                          |                               | 0.95    | 0.99 (0.94, 1.04)                                                  |                               | 0.73    | -0.36 (-1.07, 0.35)                        |                               | 0.32    |
| T1                        | 1.00                                               | 0.12                          | 0.13    | 1.00                                                       | 0.58                          | 0.78    | 1.00                                                               | 0.02                          | 0.03    | 0.00                                       | 0.47                          | 0.53    |
| T2                        | 1.23 (0.90, 1.67)                                  |                               |         | 1.28 (0.80, 2.06)                                          |                               |         | 1.22 (0.95, 1.57)                                                  |                               |         | -1.94 (-5.50, 1.62)                        |                               |         |
| T3                        | 0.88 (0.63, 1.23)                                  |                               |         | 1.20 (0.72, 1.99)                                          |                               |         | 0.85 (0.65, 1.10)                                                  |                               |         | -1.97 (-5.60, 1.66)                        |                               |         |
| <b>∑Parabens</b>          |                                                    |                               |         |                                                            |                               |         |                                                                    |                               |         |                                            |                               |         |
| Continuous <sup>d</sup>   | 0.92 (0.85, 1.00)                                  |                               | 0.06    | 1.01 (0.89, 1.14)                                          |                               | 0.93    | 0.95 (0.89, 1.02)                                                  |                               | 0.16    | -0.42 (-1.28, 0.45)                        |                               | 0.35    |
| T1                        | 1.00                                               | 0.07                          | 0.08    | 1.00                                                       | 0.90                          | 0.73    | 1.00                                                               | 0.11                          | 0.19    | 0.00                                       | 0.19                          | 0.26    |
| T2                        | 0.76 (0.56, 1.03)                                  |                               |         | 1.05 (0.66, 1.65)                                          |                               |         | 0.79 (0.62, 1.02)                                                  |                               |         | 2.15 (-1.47, 5.78)                         |                               |         |
| T3                        | 0.72 (0.52, 0.98)                                  |                               |         | 0.94 (0.58, 1.52)                                          |                               |         | 0.80 (0.62, 1.03)                                                  |                               |         | -1.20 (-4.73, 2.32)                        |                               |         |

HR = hazard ratio; FEV<sub>1</sub>% = forced expiratory volume in 1 second expressed in percent predicted; CI = confidence interval; ∑Dichlorophenols = molar sum of 2-Dichlorophenols (2,4-, 2,5-dichlorophenols); ∑Parabens = molar sum of parabens (Methyl-, Ethyl-, Propyl-, Butyl-parabens).

<sup>a</sup> Models adjusted for centre, residence area, parental history of asthma or allergies, maternal ethnicity, maximal parental education level, maternal or passive smoking during pregnancy, postnatal passive smoking, older siblings, day-care. Missing values in covariates were imputed using the MICE multiple imputation method (100 imputations were performed) <sup>b</sup> additionally adjusted for child's height and age.

<sup>c</sup> Standardized for urine sampling conditions (creatinine level, day and hour of sampling, gestational age, storage duration at room temperature and year of analysis), as detailed in Mortamais et al. (2012).

<sup>d</sup> Estimates for 1 unit increase in ln-transformed standardized concentration.

<sup>e</sup> p-values of heterogeneity test.

Italicized p-values are p-values of monotonic trend test.

**Table S11.** Adjusted associations between pregnancy phthalate metabolites standardized concentrations and respiratory outcomes (n=562) and FEV<sub>1</sub>% (n=217) in full-term boys.

| Phthalate <sup>c</sup>  | Wheezing (until age 5y) <sup>a</sup> |                                      |                 | Asthma diagnosis (until age 5y) <sup>a</sup> |                                      |                 | Bronchiolitis/Bronchitis (until age 3y) <sup>a</sup> |                                      |                 | FEV <sub>1</sub> % <sup>b</sup> |                                      |                 |
|-------------------------|--------------------------------------|--------------------------------------|-----------------|----------------------------------------------|--------------------------------------|-----------------|------------------------------------------------------|--------------------------------------|-----------------|---------------------------------|--------------------------------------|-----------------|
|                         | N = 562                              |                                      |                 | N = 562                                      |                                      |                 | N = 562                                              |                                      |                 | N = 217                         |                                      |                 |
|                         | HR (95% CI)                          | <i>p</i> <sub>het</sub> <sup>e</sup> | <i>p</i> -value | HR (95% CI)                                  | <i>p</i> <sub>het</sub> <sup>e</sup> | <i>p</i> -value | HR (95% CI)                                          | <i>p</i> <sub>het</sub> <sup>e</sup> | <i>p</i> -value | beta (95% CI)                   | <i>p</i> <sub>het</sub> <sup>e</sup> | <i>p</i> -value |
| <b>ΣLMW</b>             |                                      |                                      |                 |                                              |                                      |                 |                                                      |                                      |                 |                                 |                                      |                 |
| Continuous <sup>d</sup> | 0.94 (0.81, 1.10)                    |                                      | 0.46            | 0.99 (0.79, 1.24)                            |                                      | 0.93            | 1.00 (0.88, 1.13)                                    |                                      | 0.96            | -0.18 (-1.98, 1.63)             |                                      | 0.85            |
| T1                      | 1.00                                 | 0.75                                 | 0.58            | 1.00                                         | 0.67                                 | 0.92            | 1.00                                                 | 0.84                                 | 0.72            | 0.00                            | 0.26                                 | 0.10            |
| T2                      | 1.06 (0.77, 1.44)                    |                                      |                 | 1.21 (0.77, 1.90)                            |                                      |                 | 1.07 (0.83, 1.38)                                    |                                      |                 | -0.65 (-4.22, 2.93)             |                                      |                 |
| T3                      | 0.93 (0.68, 1.29)                    |                                      |                 | 1.02 (0.63, 1.66)                            |                                      |                 | 1.06 (0.82, 1.37)                                    |                                      |                 | -2.82 (-6.35, 0.71)             |                                      |                 |
| <b>MEP</b>              |                                      |                                      |                 |                                              |                                      |                 |                                                      |                                      |                 |                                 |                                      |                 |
| Continuous <sup>d</sup> | 0.97 (0.86, 1.10)                    |                                      | 0.64            | 1.10 (0.92, 1.31)                            |                                      | 0.29            | 1.02 (0.93, 1.12)                                    |                                      | 0.67            | -0.01 (-1.46, 1.44)             |                                      | 0.98            |
| T1                      | 1.00                                 | 1.00                                 | 0.94            | 1.00                                         | 0.51                                 | 0.33            | 1.00                                                 | 0.60                                 | 0.50            | 0.00                            | 0.99                                 | 0.95            |
| T2                      | 1.01 (0.74, 1.38)                    |                                      |                 | 0.91 (0.56, 1.48)                            |                                      |                 | 1.12 (0.87, 1.44)                                    |                                      |                 | 0.16 (-3.40, 3.71)              |                                      |                 |
| T3                      | 1.01 (0.74, 1.39)                    |                                      |                 | 1.19 (0.75, 1.89)                            |                                      |                 | 1.12 (0.86, 1.44)                                    |                                      |                 | -0.08 (-3.69, 3.54)             |                                      |                 |
| <b>MnBP</b>             |                                      |                                      |                 |                                              |                                      |                 |                                                      |                                      |                 |                                 |                                      |                 |
| Continuous <sup>d</sup> | 1.03 (0.91, 1.16)                    |                                      | 0.62            | 0.93 (0.77, 1.12)                            |                                      | 0.43            | 0.97 (0.88, 1.07)                                    |                                      | 0.54            | -0.27 (-1.66, 1.12)             |                                      | 0.70            |
| T1                      | 1.00                                 | 0.61                                 | 0.42            | 1.00                                         | 0.56                                 | 0.31            | 1.00                                                 | 0.51                                 | 0.51            | 0.00                            | 0.95                                 | 0.82            |
| T2                      | 0.95 (0.69, 1.30)                    |                                      |                 | 0.87 (0.55, 1.37)                            |                                      |                 | 0.87 (0.68, 1.12)                                    |                                      |                 | 0.27 (-3.33, 3.87)              |                                      |                 |
| T3                      | 1.10 (0.81, 1.51)                    |                                      |                 | 0.77 (0.48, 1.24)                            |                                      |                 | 0.89 (0.69, 1.15)                                    |                                      |                 | -0.33 (-4.00, 3.34)             |                                      |                 |
| <b>MiBP</b>             |                                      |                                      |                 |                                              |                                      |                 |                                                      |                                      |                 |                                 |                                      |                 |
| Continuous <sup>d</sup> | 0.97 (0.83, 1.13)                    |                                      | 0.67            | 1.00 (0.79, 1.27)                            |                                      | 0.99            | 1.01 (0.89, 1.15)                                    |                                      | 0.85            | -1.30 (-3.02, 0.41)             |                                      | 0.14            |
| T1                      | 1.00                                 | 0.75                                 | 0.96            | 1.00                                         | 0.69                                 | 0.53            | 1.00                                                 | 0.93                                 | 0.85            | 0.00                            | 0.09                                 | 0.03            |
| T2                      | 0.88 (0.64, 1.22)                    |                                      |                 | 1.09 (0.69, 1.73)                            |                                      |                 | 1.03 (0.80, 1.33)                                    |                                      |                 | -0.81 (-4.42, 2.81)             |                                      |                 |
| T3                      | 0.96 (0.70, 1.32)                    |                                      |                 | 0.88 (0.54, 1.44)                            |                                      |                 | 0.99 (0.76, 1.27)                                    |                                      |                 | -3.77 (-7.32, -0.23)            |                                      |                 |
| <b>ΣHMW</b>             |                                      |                                      |                 |                                              |                                      |                 |                                                      |                                      |                 |                                 |                                      |                 |
| Continuous <sup>d</sup> | 1.07 (0.91, 1.26)                    |                                      | 0.43            | 1.09 (0.84, 1.40)                            |                                      | 0.53            | 0.92 (0.80, 1.05)                                    |                                      | 0.21            | -1.03 (-2.90, 0.84)             |                                      | 0.28            |
| T1                      | 1.00                                 | 0.30                                 | 0.99            | 1.00                                         | 0.91                                 | 0.90            | 1.00                                                 | 0.60                                 | 0.38            | 0.00                            | 0.24                                 | 0.43            |
| T2                      | 1.27 (0.92, 1.73)                    |                                      |                 | 1.11 (0.69, 1.78)                            |                                      |                 | 0.91 (0.71, 1.17)                                    |                                      |                 | -2.99 (-6.51, 0.54)             |                                      |                 |
| T3                      | 1.06 (0.77, 1.46)                    |                                      |                 | 1.05 (0.66, 1.69)                            |                                      |                 | 0.88 (0.68, 1.14)                                    |                                      |                 | -2.04 (-5.62, 1.54)             |                                      |                 |
| <b>MCPP</b>             |                                      |                                      |                 |                                              |                                      |                 |                                                      |                                      |                 |                                 |                                      |                 |
| Continuous <sup>d</sup> | 1.04 (0.89, 1.21)                    |                                      | 0.63            | 0.88 (0.69, 1.13)                            |                                      | 0.32            | 0.90 (0.79, 1.03)                                    |                                      | 0.12            | -0.50 (-2.40, 1.40)             |                                      | 0.60            |
| T1                      | 1.00                                 | 0.72                                 | 0.46            | 1.00                                         | 0.58                                 | 0.30            | 1.00                                                 | 0.46                                 | 0.30            | 0.00                            | 0.44                                 | 0.89            |
| T2                      | 1.09 (0.79, 1.49)                    |                                      |                 | 0.97 (0.61, 1.53)                            |                                      |                 | 1.05 (0.82, 1.34)                                    |                                      |                 | -2.21 (-5.76, 1.34)             |                                      |                 |
| T3                      | 1.14 (0.83, 1.57)                    |                                      |                 | 0.79 (0.48, 1.28)                            |                                      |                 | 0.90 (0.69, 1.16)                                    |                                      |                 | -0.57 (-4.14, 2.99)             |                                      |                 |
| <b>MBzP</b>             |                                      |                                      |                 |                                              |                                      |                 |                                                      |                                      |                 |                                 |                                      |                 |
| Continuous <sup>d</sup> | 0.99 (0.87, 1.13)                    |                                      | 0.88            | 1.13 (0.94, 1.38)                            |                                      | 0.20            | 0.96 (0.87, 1.07)                                    |                                      | 0.51            | -0.11 (-1.68, 1.45)             |                                      | 0.89            |
| T1                      | 1.00                                 | 0.43                                 | 0.43            | 1.00                                         | 0.78                                 | 0.92            | 1.00                                                 | 0.34                                 | 0.14            | 0.00                            | 0.13                                 | 0.30            |
| T2                      | 1.13 (0.83, 1.54)                    |                                      |                 | 1.19 (0.74, 1.92)                            |                                      |                 | 0.96 (0.74, 1.23)                                    |                                      |                 | -3.58 (-7.19, 0.03)             |                                      |                 |
| T3                      | 0.92 (0.67, 1.27)                    |                                      |                 | 1.07 (0.67, 1.73)                            |                                      |                 | 0.83 (0.65, 1.07)                                    |                                      |                 | -2.70 (-6.29, 0.89)             |                                      |                 |
| <b>MCNP</b>             |                                      |                                      |                 |                                              |                                      |                 |                                                      |                                      |                 |                                 |                                      |                 |
| Continuous <sup>d</sup> | 1.10 (0.98, 1.25)                    |                                      | 0.11            | 1.13 (0.95, 1.34)                            |                                      | 0.18            | 1.00 (0.90, 1.10)                                    |                                      | 0.99            | 0.49 (-0.98, 1.95)              |                                      | 0.51            |
| T1                      | 1.00                                 | 0.22                                 | 0.17            | 1.00                                         | 0.29                                 | 0.24            | 1.00                                                 | 0.55                                 | 0.66            | 0.00                            | 0.94                                 | 0.89            |
| T2                      | 1.25 (0.91, 1.73)                    |                                      |                 | 1.39 (0.85, 2.29)                            |                                      |                 | 1.15 (0.89, 1.48)                                    |                                      |                 | -0.60 (-4.15, 2.96)             |                                      |                 |
| T3                      | 1.30 (0.95, 1.78)                    |                                      |                 | 1.43 (0.88, 2.30)                            |                                      |                 | 1.09 (0.85, 1.41)                                    |                                      |                 | -0.43 (-3.99, 3.13)             |                                      |                 |
| <b>MCOP</b>             |                                      |                                      |                 |                                              |                                      |                 |                                                      |                                      |                 |                                 |                                      |                 |
| Continuous <sup>d</sup> | 1.04 (0.89, 1.21)                    |                                      | 0.63            | 1.03 (0.82, 1.28)                            |                                      | 0.83            | 1.11 (0.99, 1.25)                                    |                                      | 0.08            | -1.31 (-2.95, 0.34)             |                                      | 0.12            |
| T1                      | 1.00                                 | 0.79                                 | 0.57            | 1.00                                         | 0.45                                 | 0.90            | 1.00                                                 | 0.89                                 | 0.95            | 0.00                            | 0.45                                 | 0.21            |
| T2                      | 0.92 (0.67, 1.26)                    |                                      |                 | 0.75 (0.46, 1.21)                            |                                      |                 | 1.06 (0.83, 1.37)                                    |                                      |                 | -0.59 (-4.28, 3.09)             |                                      |                 |
| T3                      | 0.90 (0.66, 1.23)                    |                                      |                 | 0.97 (0.61, 1.52)                            |                                      |                 | 1.02 (0.79, 1.32)                                    |                                      |                 | -2.21 (-5.75, 1.34)             |                                      |                 |
| <b>MEHHP</b>            |                                      |                                      |                 |                                              |                                      |                 |                                                      |                                      |                 |                                 |                                      |                 |
| Continuous <sup>d</sup> | 1.06 (0.92, 1.23)                    |                                      | 0.40            | 1.01 (0.80, 1.26)                            |                                      | 0.96            | 0.96 (0.86, 1.08)                                    |                                      | 0.54            | -0.86 (-2.45, 0.73)             |                                      | 0.29            |
| T1                      | 1.00                                 | 0.56                                 | 0.60            | 1.00                                         | 0.32                                 | 0.70            | 1.00                                                 | 0.81                                 | 0.67            | 0.00                            | 0.26                                 | 0.33            |
| T2                      | 1.19 (0.86, 1.64)                    |                                      |                 | 1.34 (0.84, 2.15)                            |                                      |                 | 1.04 (0.81, 1.34)                                    |                                      |                 | -2.88 (-6.39, 0.64)             |                                      |                 |
| T3                      | 1.12 (0.82, 1.54)                    |                                      |                 | 0.98 (0.60, 1.60)                            |                                      |                 | 0.96 (0.74, 1.23)                                    |                                      |                 | -1.93 (-5.57, 1.72)             |                                      |                 |
| <b>MEOHP</b>            |                                      |                                      |                 |                                              |                                      |                 |                                                      |                                      |                 |                                 |                                      |                 |
| Continuous <sup>d</sup> | 1.07 (0.92, 1.24)                    |                                      | 0.37            | 1.01 (0.80, 1.27)                            |                                      | 0.95            | 0.94 (0.84, 1.06)                                    |                                      | 0.34            | -1.26 (-2.89, 0.37)             |                                      | 0.13            |
| T1                      | 1.00                                 | 0.36                                 | 0.67            | 1.00                                         | 0.88                                 | 0.68            | 1.00                                                 | 0.56                                 | 0.53            | 0.00                            | 0.08                                 | 0.08            |
| T2                      | 1.26 (0.92, 1.73)                    |                                      |                 | 1.03 (0.65, 1.64)                            |                                      |                 | 1.08 (0.84, 1.39)                                    |                                      |                 | -3.58 (-7.13, -0.04)            |                                      |                 |
| T3                      | 1.11 (0.81, 1.54)                    |                                      |                 | 0.92 (0.57, 1.47)                            |                                      |                 | 0.94 (0.73, 1.21)                                    |                                      |                 | -3.35 (-6.89, 0.20)             |                                      |                 |
| <b>MECPP</b>            |                                      |                                      |                 |                                              |                                      |                 |                                                      |                                      |                 |                                 |                                      |                 |
| Continuous <sup>d</sup> | 1.06 (0.91, 1.24)                    |                                      | 0.44            | 1.08 (0.86, 1.38)                            |                                      | 0.50            | 0.93 (0.82, 1.06)                                    |                                      | 0.28            | -1.31 (-3.06, 0.44)             |                                      | 0.14            |
| T1                      | 1.00                                 | 0.14                                 | 0.85            | 1.00                                         | 0.44                                 | 0.94            | 1.00                                                 | 0.92                                 | 0.73            | 0.00                            | 0.12                                 | 0.10            |
| T2                      | 1.36 (0.99, 1.85)                    |                                      |                 | 1.32 (0.83, 2.11)                            |                                      |                 | 1.01 (0.79, 1.30)                                    |                                      |                 | -3.12 (-6.67, 0.45)             |                                      |                 |
| T3                      | 1.11 (0.80, 1.53)                    |                                      |                 | 1.05 (0.65, 1.72)                            |                                      |                 | 0.96 (0.75, 1.24)                                    |                                      |                 | -3.35 (-6.91, 0.21)             |                                      |                 |
| <b>MEHP</b>             |                                      |                                      |                 |                                              |                                      |                 |                                                      |                                      |                 |                                 |                                      |                 |
| Continuous <sup>d</sup> | 1.02 (0.90, 1.15)                    |                                      | 0.76            | 0.98 (0.81, 1.18)                            |                                      | 0.84            | 0.93 (0.84, 1.03)                                    |                                      | 0.16            | -0.83 (-2.18, 0.52)             |                                      | 0.23            |
| T1                      | 1.00                                 | 0.71                                 | 0.41            | 1.00                                         | 0.77                                 | 0.48            | 1.00                                                 | 0.24                                 | 0.65            | 0.00                            | 0.31                                 | 0.16            |
| T2                      | 1.02 (0.74, 1.40)                    |                                      |                 | 1.01 (0.63, 1.63)                            |                                      |                 | 0.81 (0.63, 1.04)                                    |                                      |                 | 0.04 (-3.51, 3.58)              |                                      |                 |
| T3                      | 1.13 (0.83, 1.54)                    |                                      |                 | 1.17 (0.73, 1.85)                            |                                      |                 | 0.91 (0.71, 1.16)                                    |                                      |                 | -2.36 (-5.92, 1.20)             |                                      |                 |
| <b>ΣDEHP</b>            |                                      |                                      |                 |                                              |                                      |                 |                                                      |                                      |                 |                                 |                                      |                 |
| Continuous <sup>d</sup> | 1.06 (0.91, 1.24)                    |                                      | 0.46            | 1.03 (0.81, 1.31)                            |                                      | 0.81            | 0.94 (0.82, 1.06)                                    |                                      | 0.30            | -1.18 (-2.88, 0.52)             |                                      | 0.17            |
| T1                      | 1.00                                 | 0.23                                 | 0.98            | 1.00                                         | 0.60                                 | 0.70            | 1.00                                                 | 0.84                                 | 0.59            | 0.00                            | 0.16                                 | 0.32            |
| T2                      | 1.30 (0.95, 1.78)                    |                                      |                 | 1.19 (0.75, 1.91)                            |                                      |                 | 1.01 (0.79, 1.30)                                    |                                      |                 | -3.41 (-6.94, 0.12)             |                                      |                 |
| T3                      | 1.06 (0.77, 1.47)                    |                                      |                 | 0.96 (0.59, 1.55)                            |                                      |                 | 0.94 (0.73, 1.21)                                    |                                      |                 | -1.99 (-5.56, 1.58)             |                                      |                 |

HR = hazard ratio; FEV<sub>1</sub>% = forced expiratory volume in 1 second expressed in percent predicted; CI = confidence interval; ΣLMW = molar sum of Low Molecular Weight phthalates (MEP, MnBP, MiBP); ΣHMW = molar sum of High Molecular Weight phthalates (MCPP, MBzP, MCNP, MCOP, MEHHP, MEOHP, MECPP, MEHP); ΣDEHP = molar sum of di(2-ethylhexyl) phthalate metabolites (MEHHP, MEOHP, MECPP, MEHP). Parent compounds and associated metabolites are detailed in Table S1 (Supplemental material)

<sup>a</sup> Models adjusted for centre, residence area, parental history of asthma or allergies, maternal ethnicity, maximal parental education level, maternal or passive smoking during pregnancy, postnatal passive smoking, older siblings, day-care. Missing values in covariates were imputed using the MICE multiple imputation method (100 imputations were performed) <sup>b</sup> additionally adjusted for child's height and age.

<sup>c</sup> Standardized for urine sampling conditions (creatinine level, day and hour of sampling, gestational age, storage duration at room temperature and year of analysis), as detailed in Mortamais et al. (2012).

<sup>d</sup> Estimates for 1 unit increase in ln-transformed standardized concentration.

<sup>e</sup> *p*-values of heterogeneity test.

Italicized *p*-values are *p*-values of monotonic trend test.

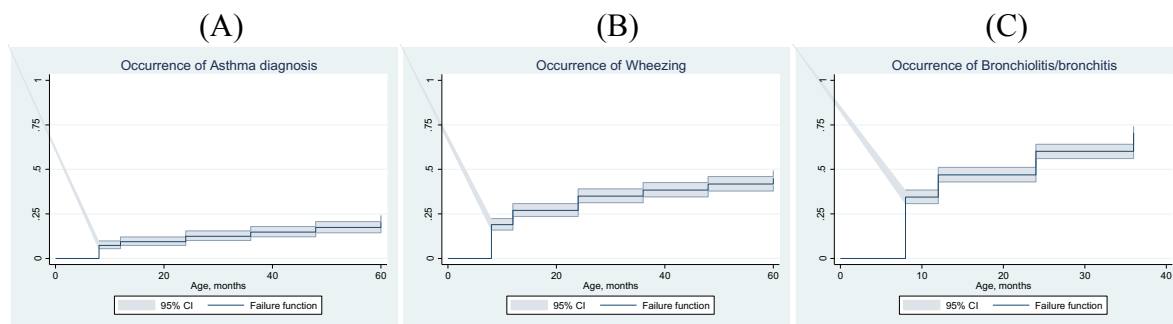

Figure S1. Occurrence of doctor-diagnosed asthma (A), wheezing (B) and bronchiolitis/bronchitis (C), Kaplan-Meier estimates.
